# Supplementary material
Source: publisher figshare collection journal article supplement (https://acs.figshare.com/ndownloader/files/3799849)
Supplement: Supplementary file 1 [file 3799849]

# Supporting information

## Alkali-metal Monophenolates with a Sandwich-type Center as Catalysts for Highly Isolelective Polymerization of *rac*-Lactide

Zhongran Dai, Yangyang Sun, Jiao Xiong, Xiaobo Pan and Jincai Wu\*

### Experiment

**Materials and Methods.** All the syntheses were performed under a dry nitrogen atmosphere using standard Schlenk techniques. Reagents were purified by standard methods: toluene, n-hexane, THF were distilled under nitrogen from sodium/benzophenone ketyl prior to use; CH<sub>2</sub>Cl<sub>2</sub> and CHCl<sub>3</sub> was distilled from P<sub>2</sub>O<sub>5</sub>; BnOH were distilled from CaH<sub>2</sub>; *rac*-lactide was purchased from Daigang BIO Engineer Limited Co. of China and recrystallized from toluene; NaHMDS and KHMDS were purchased from Acros Company. Crown ethers were purchased from J&K Scientific. <sup>1</sup>H NMR and <sup>13</sup>C NMR were recorded on a Varian Mercury Plus 300 MHz spectrometer, JNM\_ECS 400 MHz, and Varian INOVA 600 MHz. <sup>1</sup>H NMR chemical shifts are reported in ppm versus residual protons in deuterated solvents as follows: δ 7.26 ppm for chloroform-d, δ 7.16 ppm for benzene-d<sub>6</sub>, δ 2.08 ppm for toluene-d<sub>8</sub>, δ 5.32 ppm for dichloromethane-d<sub>2</sub>. <sup>13</sup>C{<sup>1</sup>H} NMR chemical shifts are reported in ppm versus residual <sup>13</sup>C in the solvent: δ 77.0 ppm for chloroform-d, δ 128.06 ppm for benzene-d<sub>6</sub>, δ 137.48 ppm for toluene-d<sub>8</sub>. The elemental analyses of the complexes were measured using an Elemental Vario EL series CHN analyzer with the samples under a nitrogen atmosphere. The molecular weights (*M<sub>n</sub>* and *M<sub>w</sub>*) and the molecular mass distributions (*M<sub>w</sub>/M<sub>n</sub>*) of the polymer samples were measured by gel permeation chromatography (GPC) at 25 °C using THF as the solvent, an eluent flow

rate of 1 mL/min, and narrow polystyrene standards as reference samples. The measurements were performed using a Waters 1525 binary system that was equipped with a Waters 2414 RI detector using two Styragel columns ( $10^2$ - $10^6$  kg/mol). Each reported value is the average of two independent measurements and was corrected using a factor of 0.58 for polylactide according to the literature.<sup>[1]</sup> Calorimetric measurements were conducted using a Sapphire DSC apparatus manufactured by PerkinElmer Instruments. Polymer samples (5.0 mg) were placed in aluminum pans and heated/cooled at a rate of  $10\text{ }^{\circ}\text{C min}^{-1}$  under a nitrogen atmosphere. The previous thermal history of the samples was erased by heating them to  $200\text{ }^{\circ}\text{C}$  before cooling them to  $0\text{ }^{\circ}\text{C}$ . Measurements were performed between  $30\text{ }^{\circ}\text{C}$  and  $200\text{ }^{\circ}\text{C}$ . The melting temperatures were evaluated as the maxima of the melting endotherms. The MALDI TOF mass spectroscopic data were obtained using  $\alpha$ -cyano-4-hydroxycinnamic acid as the matrix in a Bruker Daltonics, Inc. BIFLEX III MALDI TOF mass spectrometer. The ESI mass spectroscopic data were obtained using a Thermo Scientific Orbitrap Elite MS (LTQ Orbitrap Elit).

Synthesis of HL: Under an inert atmosphere, 4-*tert*-butylphenol (0.3 g, 2.0 mmol) and xanthidrol (0.8 g, 4.0 mmol) were mixed in a 100 mL Schlenk flask. The mixture was heated to  $128\text{ }^{\circ}\text{C}$  slowly to produce a melt, then the temperature was maintained for 2 h to ensure a reaction completed. After cooling to room temperature, the crude solid was recrystallized from methanol, and a white solid was achieved (0.74 g, 73 % yield).  $^1\text{H NMR}$  (300 MHz, chloroform-*d*,  $25\text{ }^{\circ}\text{C}$ ):  $\delta$  7.20-7.24 (m, 4H, Ar-*H*), 7.12 (d, 4H, Ar-*H*), 7.03 (s, 2H, Ar-*H*), 6.97 (d, 8H, Ar-*H*), 5.51 (s, 2H, Ar-*CH*-Ar), 4.53 (s, 1H, Ar-*OH*), 1.20 (s, 9H, Ar- $\text{C}(\text{CH}_3)_3$ ),  $^{13}\text{CNMR}$  (75 MHz, chloroform-*d*,  $25\text{ }^{\circ}\text{C}$ ):  $\delta$  151.45, 148.41, 143.77, 130.69, 128.91, 128.14, 127.43, 123.51, 123.31, 116.44

(Ar-C), 39.40 (Ar-CH-Ar), 34.04 (Ar-C(CH<sub>3</sub>)<sub>3</sub>), 31.46 (Ar-C(CH<sub>3</sub>)<sub>3</sub>). Anal. Calcd for C<sub>36</sub>H<sub>30</sub>O<sub>3</sub>: C, 84.68; H, 5.92. Found: C, 84.21; H, 5.68.

General Preparation Procedures for **1a-1c**: Under an inert atmosphere, a KHMDS/NaHMDS solution (1.2 mmol, 1 mol/L in THF) was added dropwise into a THF solution (10 mL) of HL (1.0 mmol) and 18-Crown-6/15-Crown-5 (1.0 mmol). The reaction mixture was stirred overnight. The solution was filtered. Volatile materials were removed from the filtrate under vacuum and the residue was recrystallized from a THF solution affording a white crystalline powder.

Synthesis of **1a**: yield 0.52 g (61 %). <sup>1</sup>H NMR (400 MHz, benzene-d<sub>6</sub>, 25 °C): δ 7.82 (d, *J* = 8 Hz, 4H, Ar-*H*), 7.24 (d, *J* = 8 Hz, 4H, Ar-*H*), 7.23 (s, 2H, Ar-*H*), 7.02 (m, 6H, Ar-*H* and Ar-CH-Ar), 6.90 (t, *J* = 8 Hz, 4H, Ar-*H*), 2.99 (s, 24H, crown ether-*H*), 1.15 (s, 9H, Ar-C(CH<sub>3</sub>)<sub>3</sub>), <sup>13</sup>CNMR (100 MHz, benzene-d<sub>6</sub>, 25 °C): δ 152.97, 131.13, 130.03, 126.53, 122.97, 115.79 (Ar-*C* and Ar-CH-Ar), 70.07 (crown ether-*C*), 32.42 (Ar-C(CH<sub>3</sub>)<sub>3</sub>). Anal. Calcd for C<sub>48</sub>H<sub>53</sub>O<sub>9</sub>K·0.5 THF: C, 70.73; H, 6.77. Found: C, 70.39; H, 6.53.

Synthesis of **1b**: yield 0.45 g (57 %). <sup>1</sup>H NMR (400 MHz, toluene-d<sub>8</sub>, 25 °C): δ 7.57 (br, 4H, Ar-*H*), 7.14 (m, 6H, Ar-*H*), 7.01 (m, 6H, Ar-CH-Ar and Ar-*H*), 6.83 (t, 4H, *J* = 8 Hz, Ar-*H*), 2.94 (s, 20H, crown ether-*H*), 1.13 (s, 9H, Ar-C(CH<sub>3</sub>)<sub>3</sub>), <sup>13</sup>CNMR (150 MHz, toluene-d<sub>8</sub>, 25 °C): δ = 152.85, 130.77, 129.18, 126.62, 122.91, 115.86 (Ar-*C* and Ar-CH-Ar), 68.91 (crown ether-*C*), 33.99 (Ar-C(CH<sub>3</sub>)<sub>3</sub>), 32.24 (Ar-C(CH<sub>3</sub>)<sub>3</sub>). Anal. Calcd for C<sub>46</sub>H<sub>49</sub>O<sub>8</sub>Na·0.5 THF: C, 73.08; H, 6.77. Found: C, 72.82; H, 6.63.

Synthese of **1c**: yield 0.43 g (52 %).  $^1\text{H}$  NMR (400 MHz, benzene- $\text{d}_6$ , 25  $^\circ\text{C}$ ):  $\delta$  7.76 (d,  $J$  = 8 Hz, 4H, Ar- $H$ ), 7.28 (s, 2H, Ar- $H$ ), 7.25 (d,  $J$  = 8 Hz, 4H, Ar- $H$ ), 7.04 (t, 4H,  $J$  = 8 Hz, Ar- $H$ ), 6.93 (t, 6H,  $J$  = 8 Hz, Ar- $H$  and Ar-CH-Ar), 3.03 (s, 24H, crown ether- $H$ ), 1.15 (s, 9H, Ar-C( $\text{CH}_3$ ) $_3$ ),  $^{13}\text{C}$  NMR (100 MHz, benzene- $\text{d}_6$ , 25  $^\circ\text{C}$ ):  $\delta$  153.06, 130.83, 130.04, 126.65, 122.92, 115.84 (Ar-C and Ar-CH-Ar), 69.30 (crown ether-C), 34.03 (Ar-C( $\text{CH}_3$ ) $_3$ ), 32.35 (Ar-C( $\text{CH}_3$ ) $_3$ ). Anal. Calcd for  $\text{C}_{48}\text{H}_{53}\text{O}_9\text{Na}\cdot 0.5\text{THF}$ : C, 72.10; H, 6.90. Found: C, 72.31; H, 6.50.

#### Typical polymerization of *rac*-lactide.

A typical polymerization procedure is exemplified by the synthesis of poly(*rac*-LA) at room temperature (Table1, entry 5). *Rac*-Lactide (0.288 g, 2.0 mmol) was added to a solution of **1a** (0.016 g, 0.02 mmol) and BnOH (2.0  $\mu\text{l}$ , 0.02 mmol) in toluene (5 mL). After the solution was stirred at room temperature for 10 min, the reaction was then quenched by the addition of a drop of water. Then the solution was concentrated under vacuum, and the polymer was recrystallized from dichloromethane and hexane. The final polymer was then dried under vacuum to constant weight.

#### Crystallographic Studies

The data were collected on SuperNova (Dual) X-ray diffraction diffractometer with graphite-monochromated Mo  $\text{K}\alpha$  radiation ( $\lambda$  = 0.71073 Å). The structure was solved by direct methods of Siemens SHELXTL PLUS program.<sup>[2]</sup> Non-hydrogen atoms were refined with anisotropic displacement parameters during the final cycles. All hydrogen atoms were placed by geometrical considerations and were added to the structure-factor calculation.

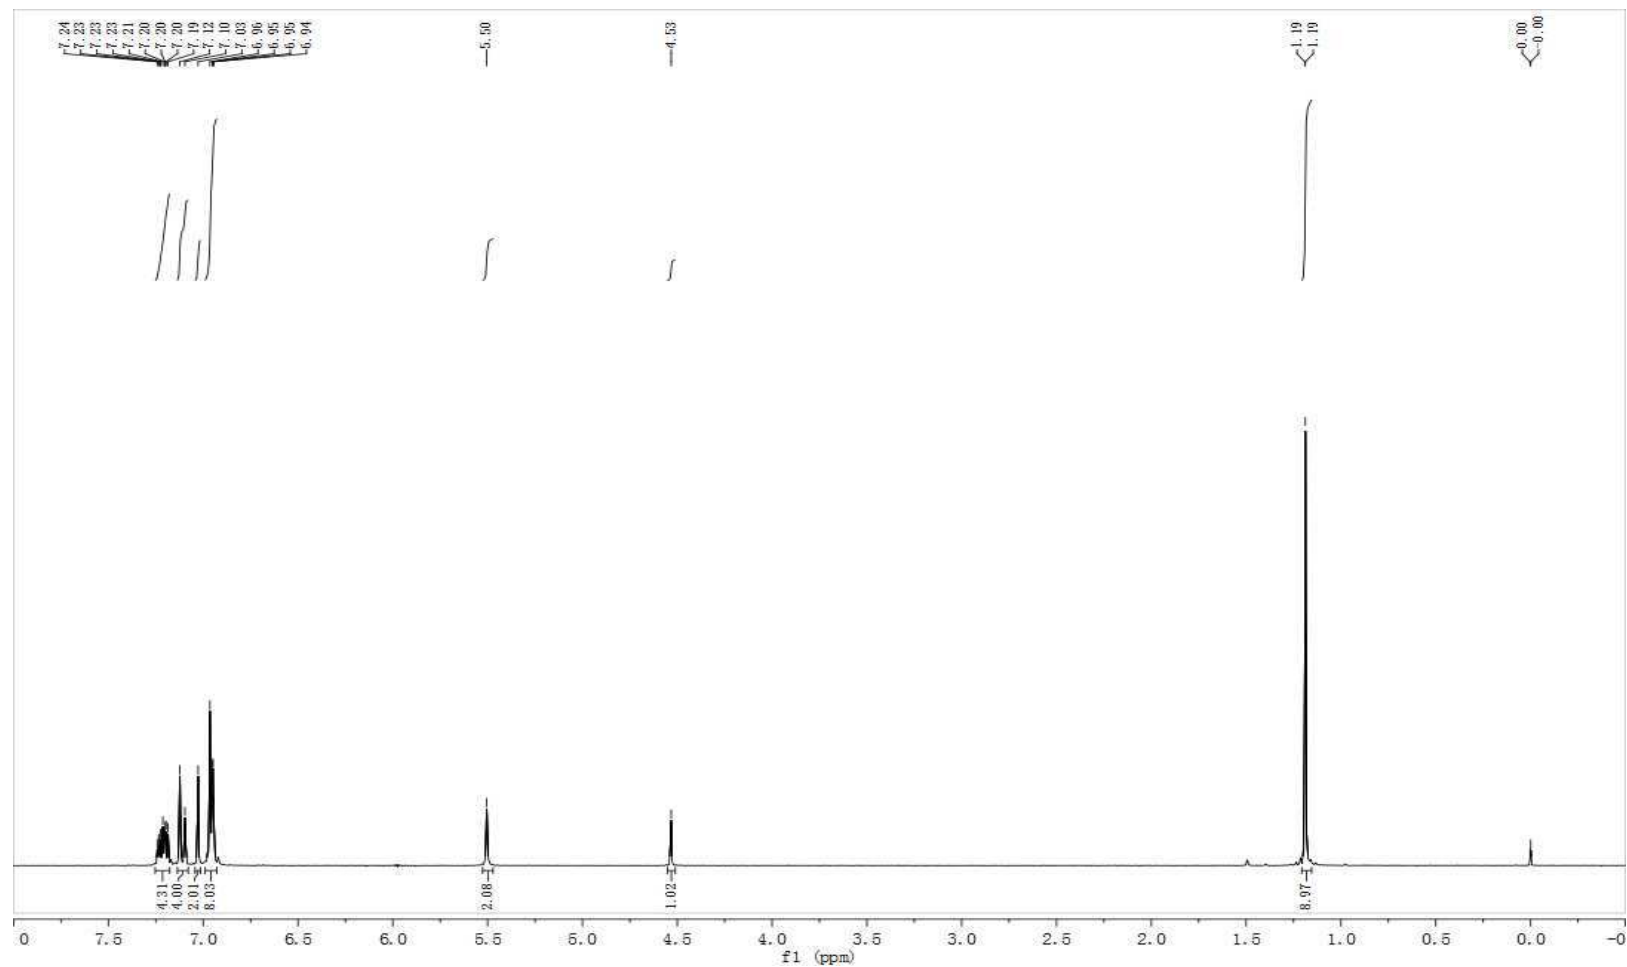

**Fig. S1** <sup>1</sup>H NMR spectrum (300 MHz, chloroform-d, 25 °C) of HL.

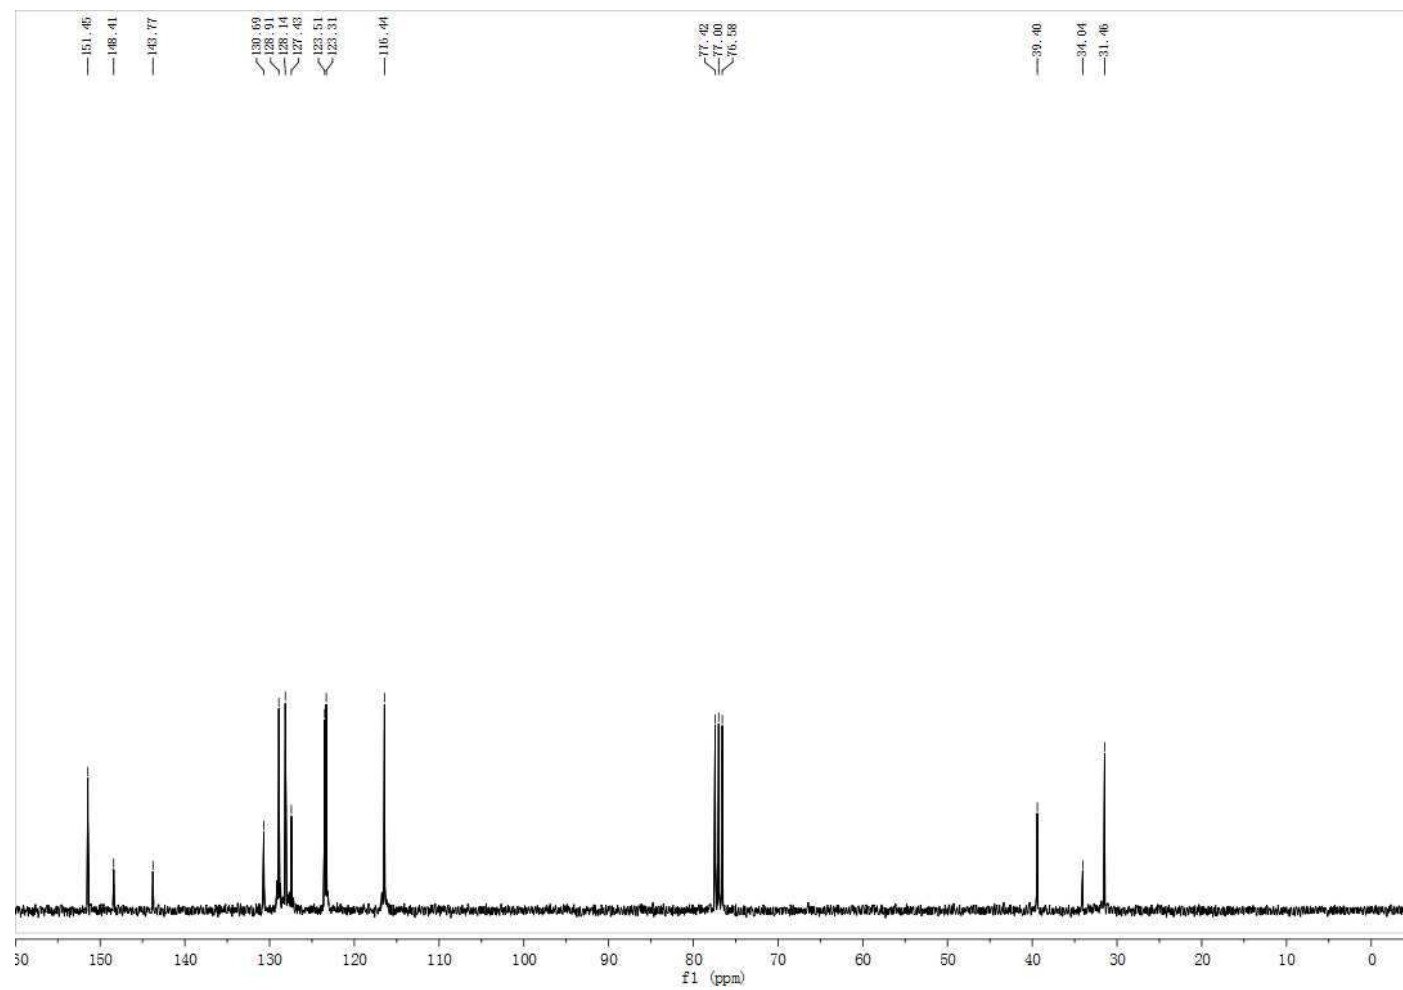

**Fig. S2**  $^{13}\text{C}$ NMR spectrum (75 MHz, chloroform-d, 25  $^{\circ}\text{C}$ ) of HL.

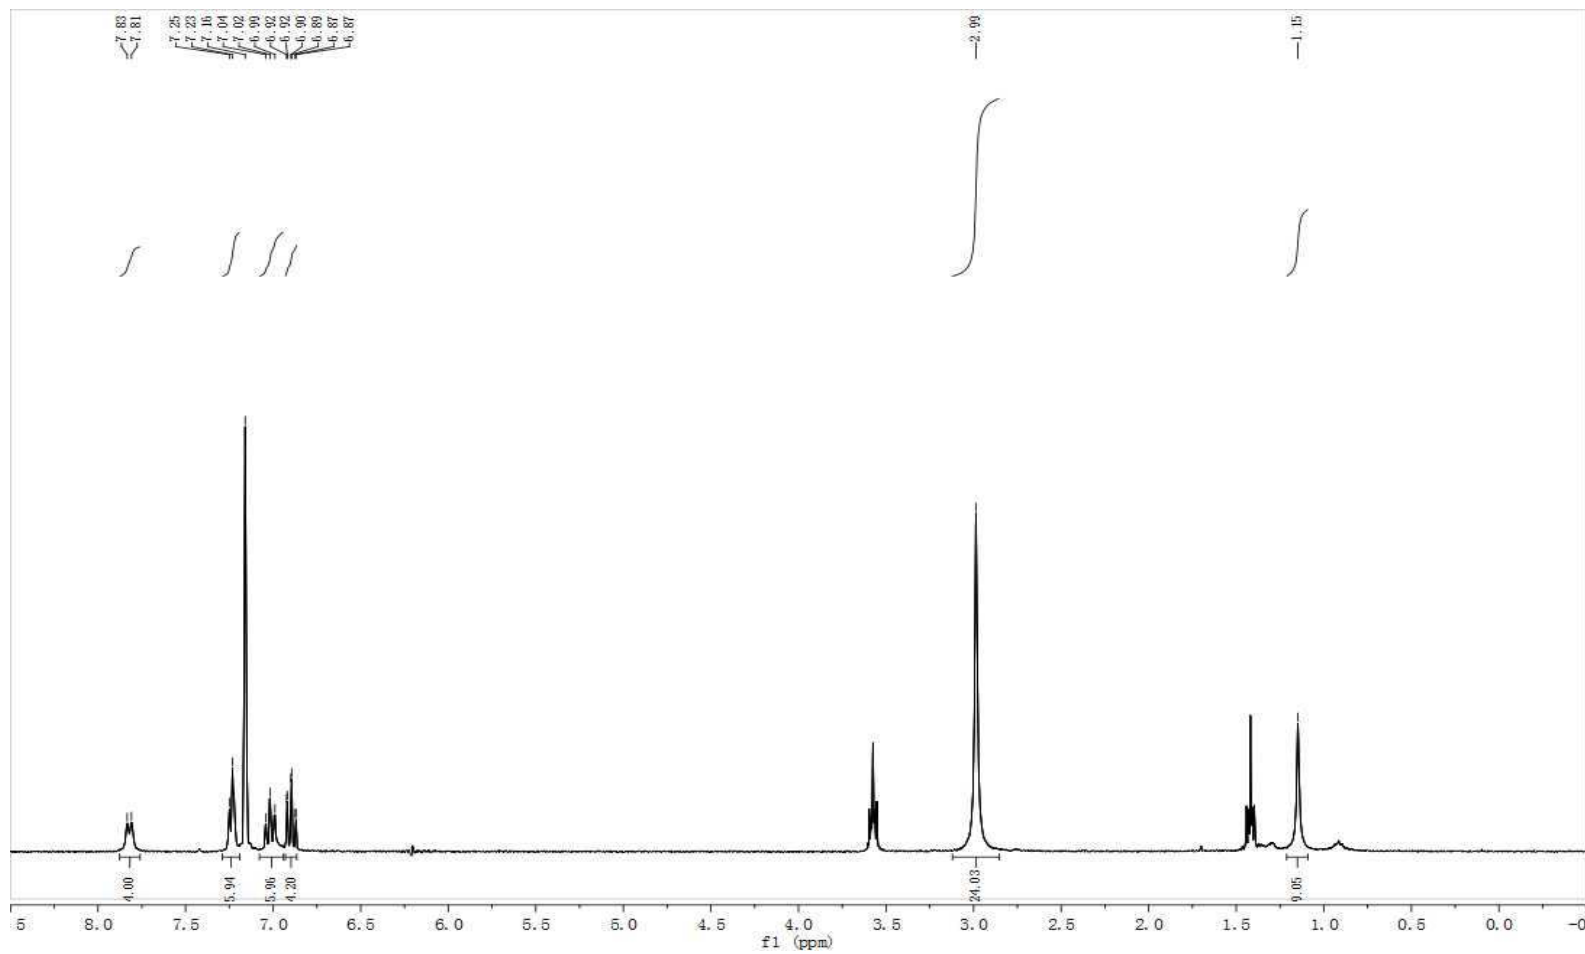

**Fig. S3**  $^1\text{H}$  NMR spectrum (400 MHz, benzene- $\text{d}_6$ , 25  $^\circ\text{C}$ ) of **1a**.

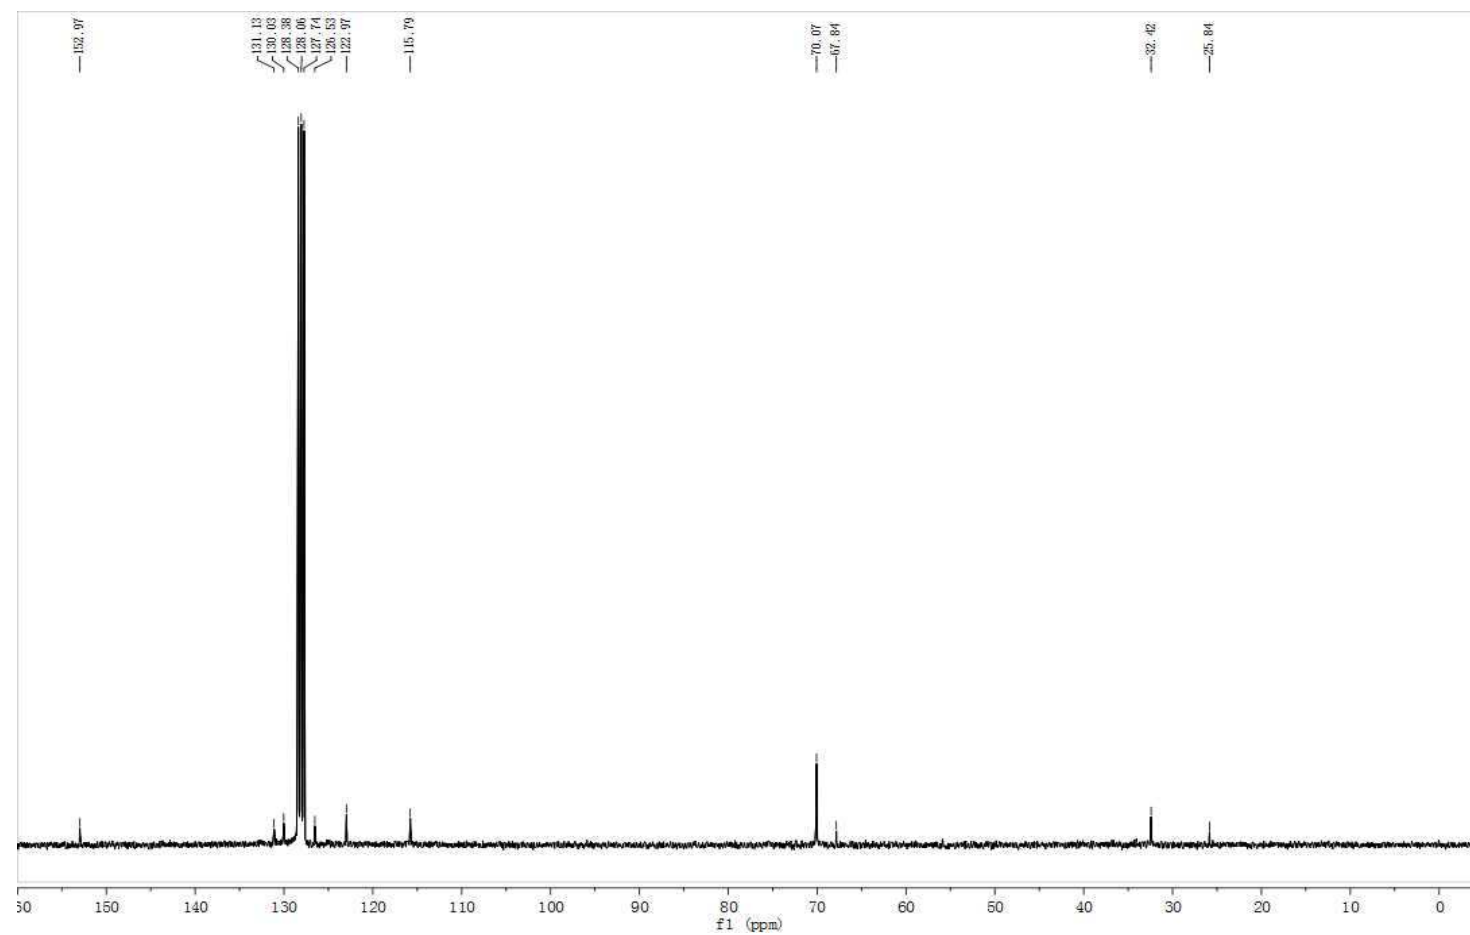

**Fig. S4**  $^{13}\text{C}$ NMR spectrum (100 MHz, benzene- $\text{d}_6$ , 25  $^\circ\text{C}$ ) of **1a**.



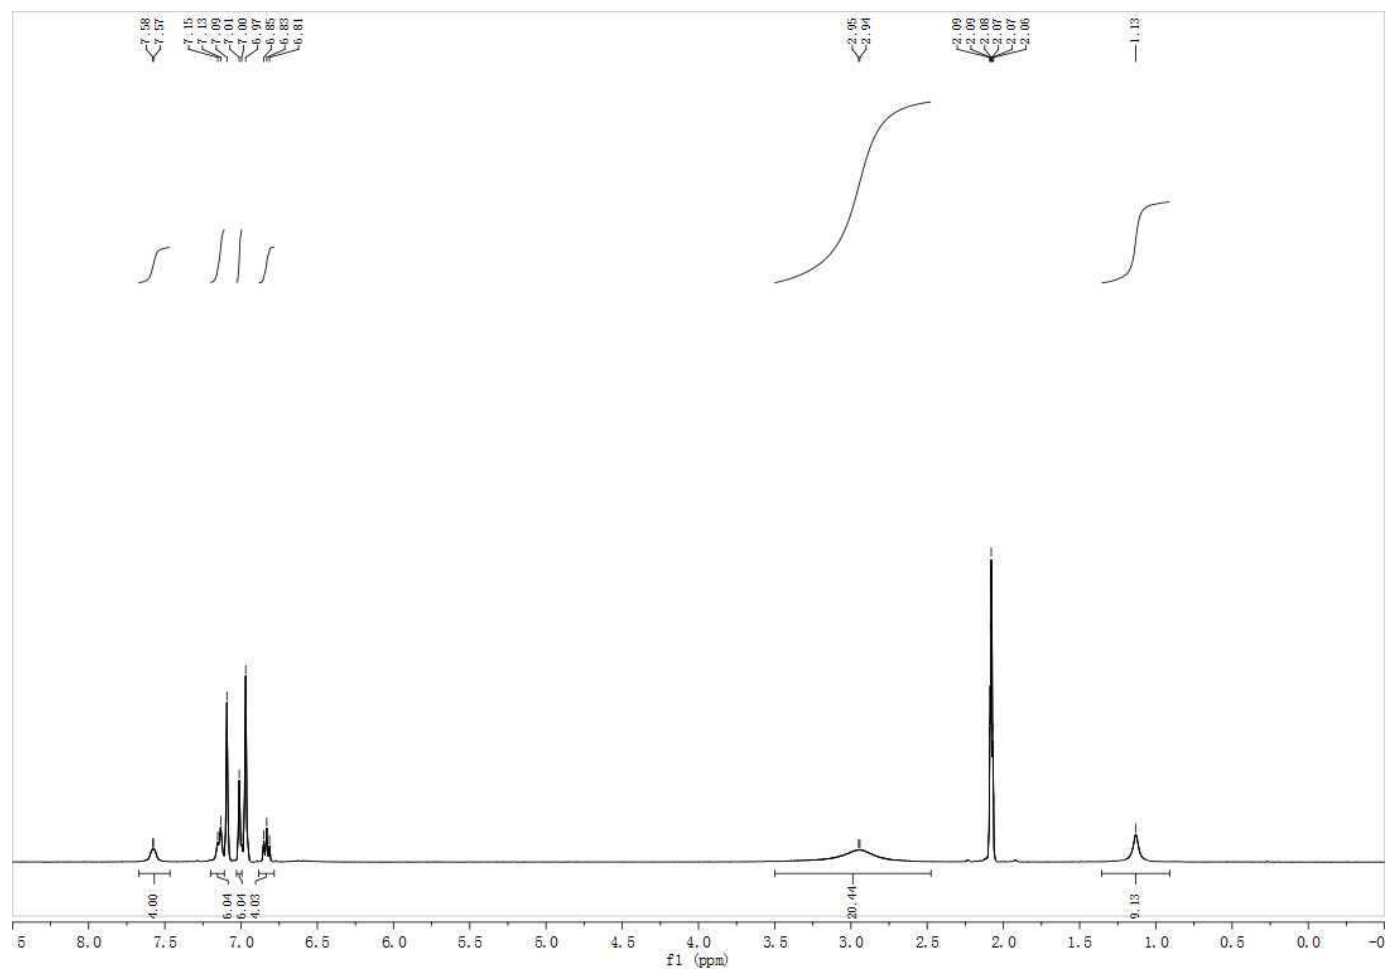

**Fig. S5** <sup>1</sup>H NMR spectrum (400 MHz, toluene-d<sub>8</sub>, 25 °C) of **1b**.

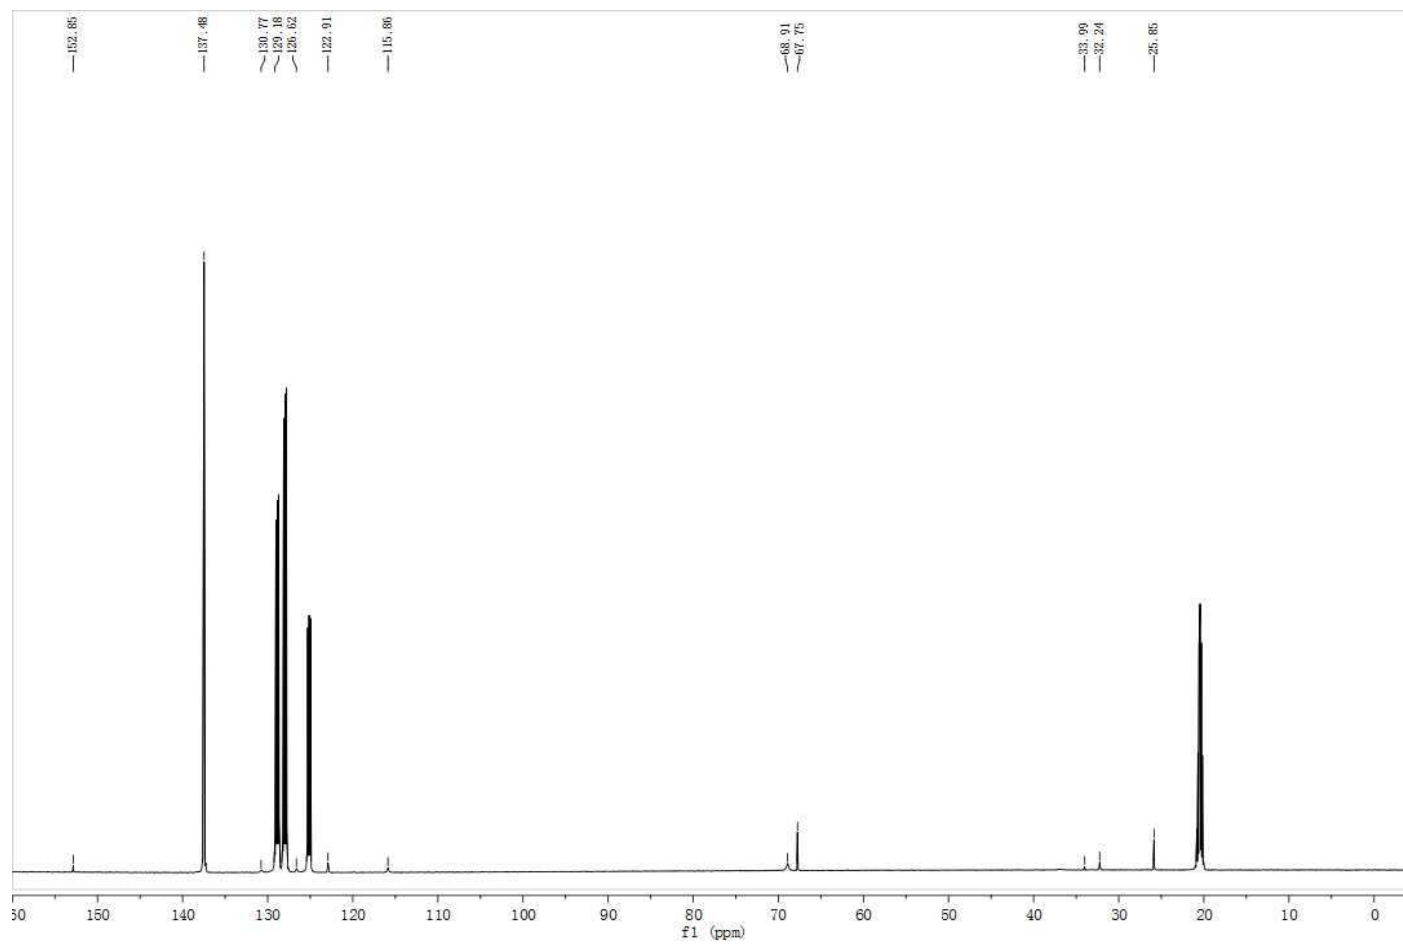

**Fig. S6**  $^{13}\text{C}$  NMR spectrum (150 MHz, toluene- $\text{d}_8$ , 25  $^{\circ}\text{C}$ ) of **1b**.

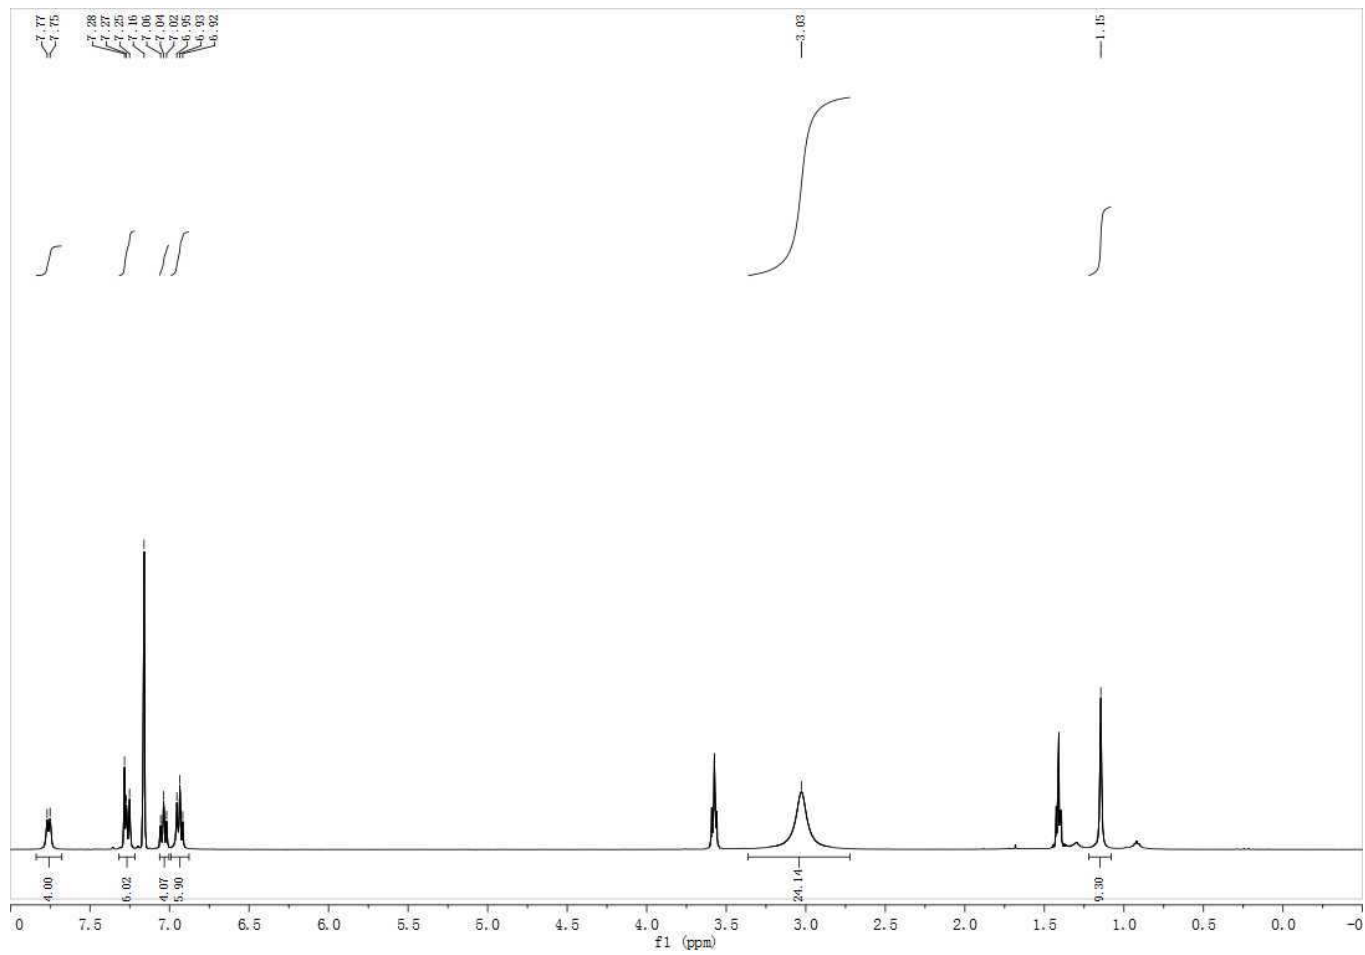

**Fig. S7**  $^1\text{H}$  NMR spectrum (400 MHz, benzene- $\text{d}_6$ , 25  $^\circ\text{C}$ ) of **1c**.

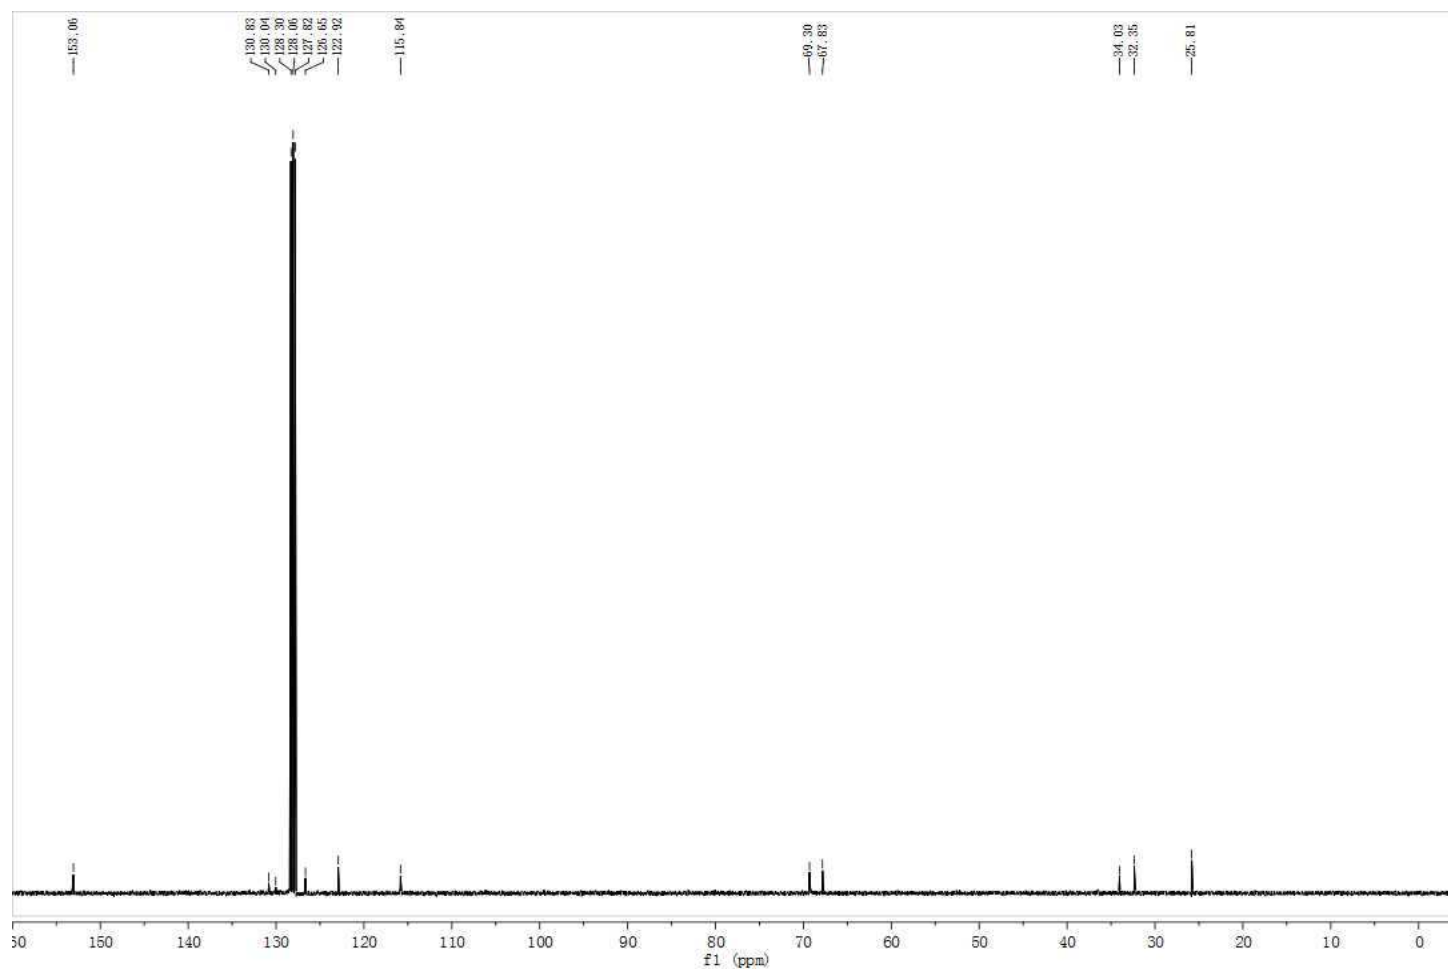

**Fig. S8**  $^{13}\text{C}$ NMR spectrum (100 MHz, benzene- $\text{d}_6$ , 25  $^{\circ}\text{C}$ ) of **1c**.

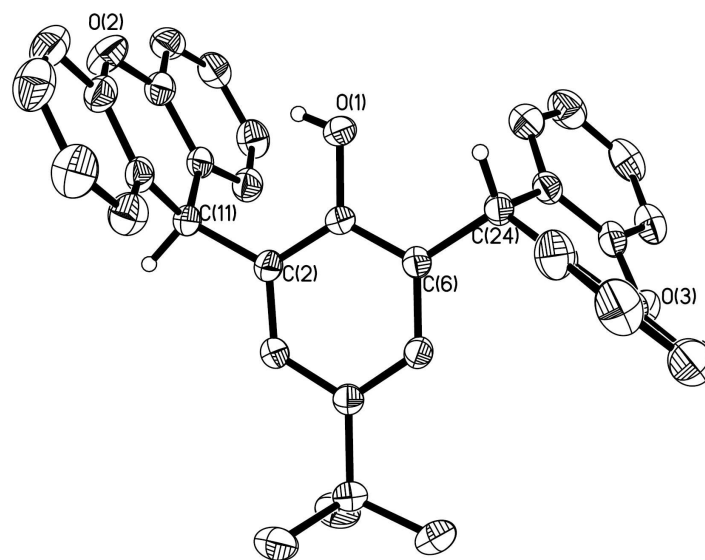

**Fig. S9.** ORTEP drawing of phenolic ligands (HL) with probability ellipsoids at the 30%, most of the hydrogen atoms are omitted for clarity. Selected bond lengths (Å): C2-C11 1.522(3), C6-C24 1.532(3).

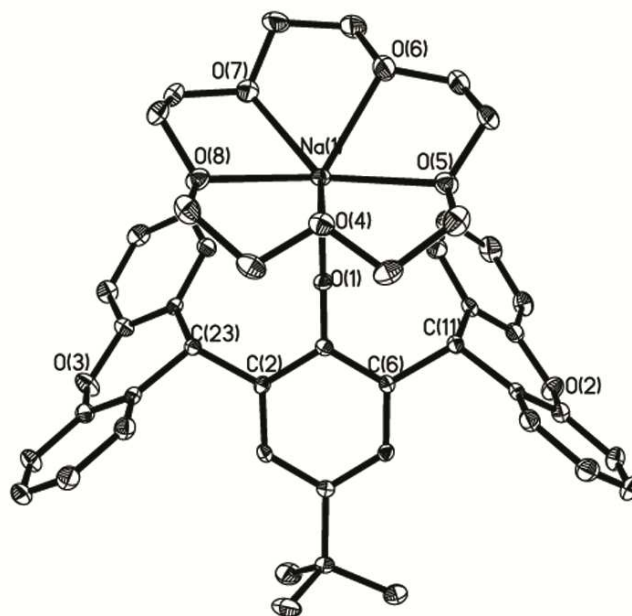

**Fig. S10** ORTEP drawing of complex **1b** with probability ellipsoids at the 30%, hydrogen atoms are omitted for clarity. Selected bond lengths (Å) and angles (°): Na1-O1 2.1482(17), Na1-O4 2.4436(19), Na1-O5 2.4306(19), Na1-O6 2.3619(19), Na1-O7 2.457(2), Na1-O8 2.3687(18), O1-Na1-O4 93.41(7), O1-Na1-O5 94.15(6), O1-Na1-O6 136.23(8), O1-Na1-O7 115.96(7), O1-Na1-O8 98.07(6).

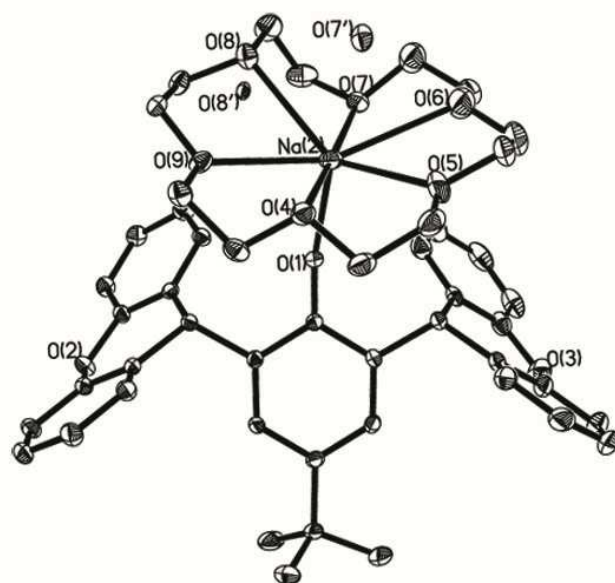

**Fig. S11** ORTEP drawing of complex **1c** with probability ellipsoids at the 30%, hydrogen atoms are omitted for clarity. Selected bond lengths (Å) and angles (°): Na2-O1 2.1860(18), Na2-O4 2.783(2), Na2-O5 2.580(2), Na2-O6 2.865(3), Na2-O7 2.744(2), Na2-O8 2.764(4), Na2-O9 2.6329(19), O1-Na2-O4 89.81(6), O1-Na2-O5 99.35(7), O1-Na2-O6 115.06(8), O1-Na2-O7 95.61(7), O1-Na2-O8 118.66(13), O1-Na2-O9 87.57(6).

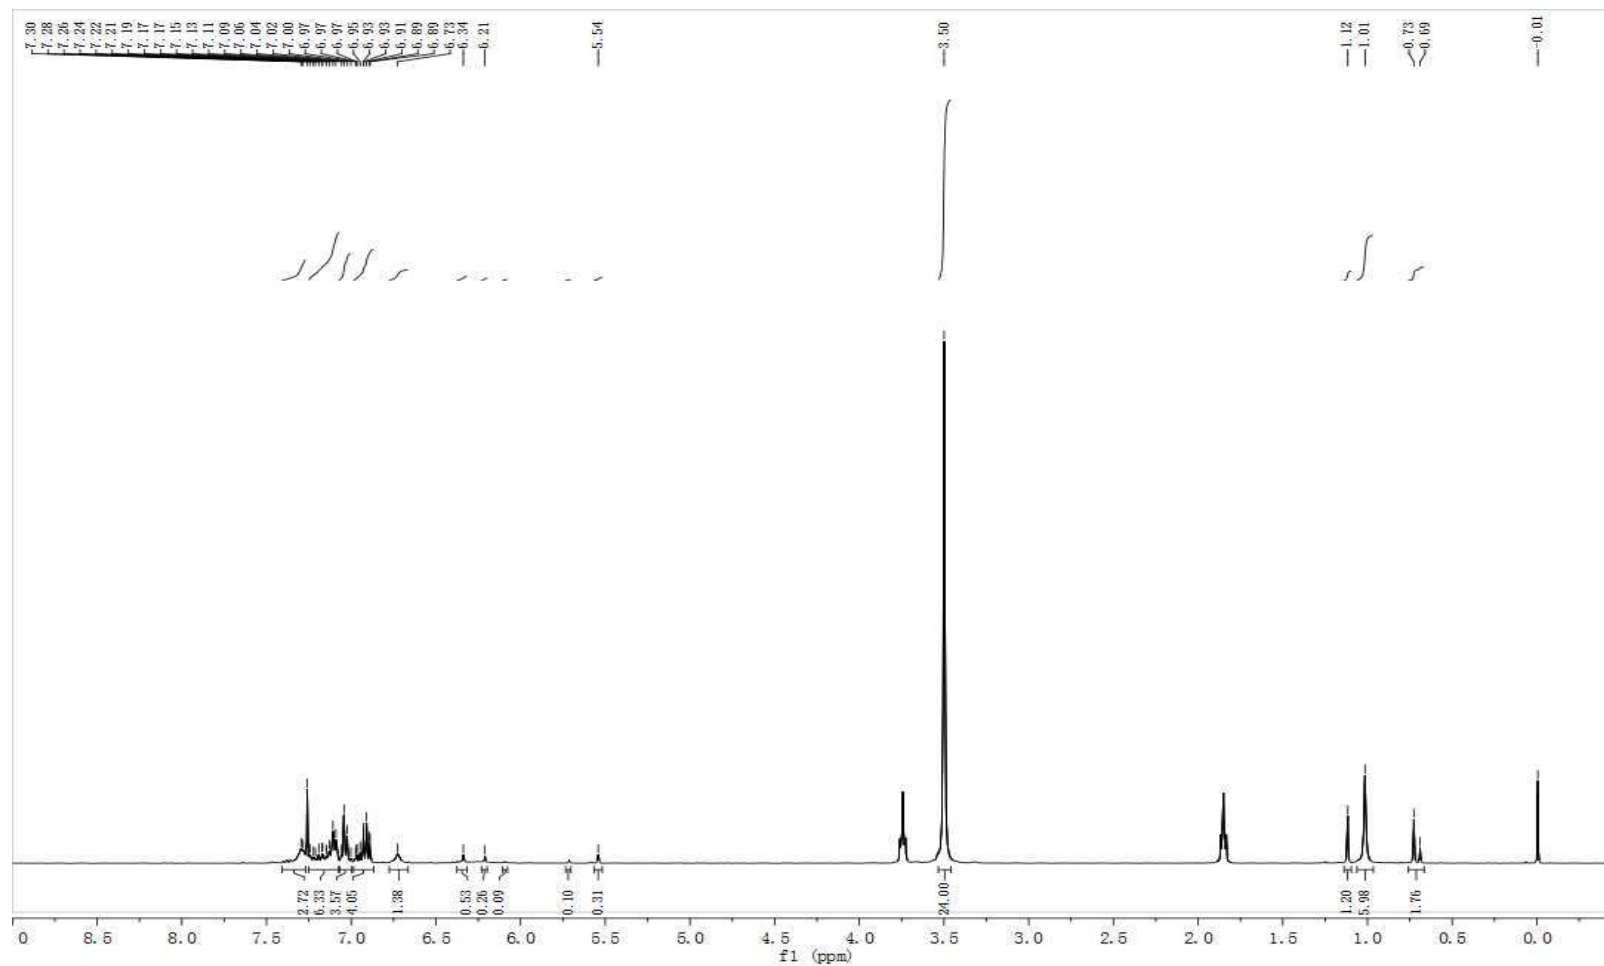

**Fig. S12**  $^1\text{H}$  NMR spectrum of **1a** in chloroform-d (400 MHz, 25  $^\circ\text{C}$ ).



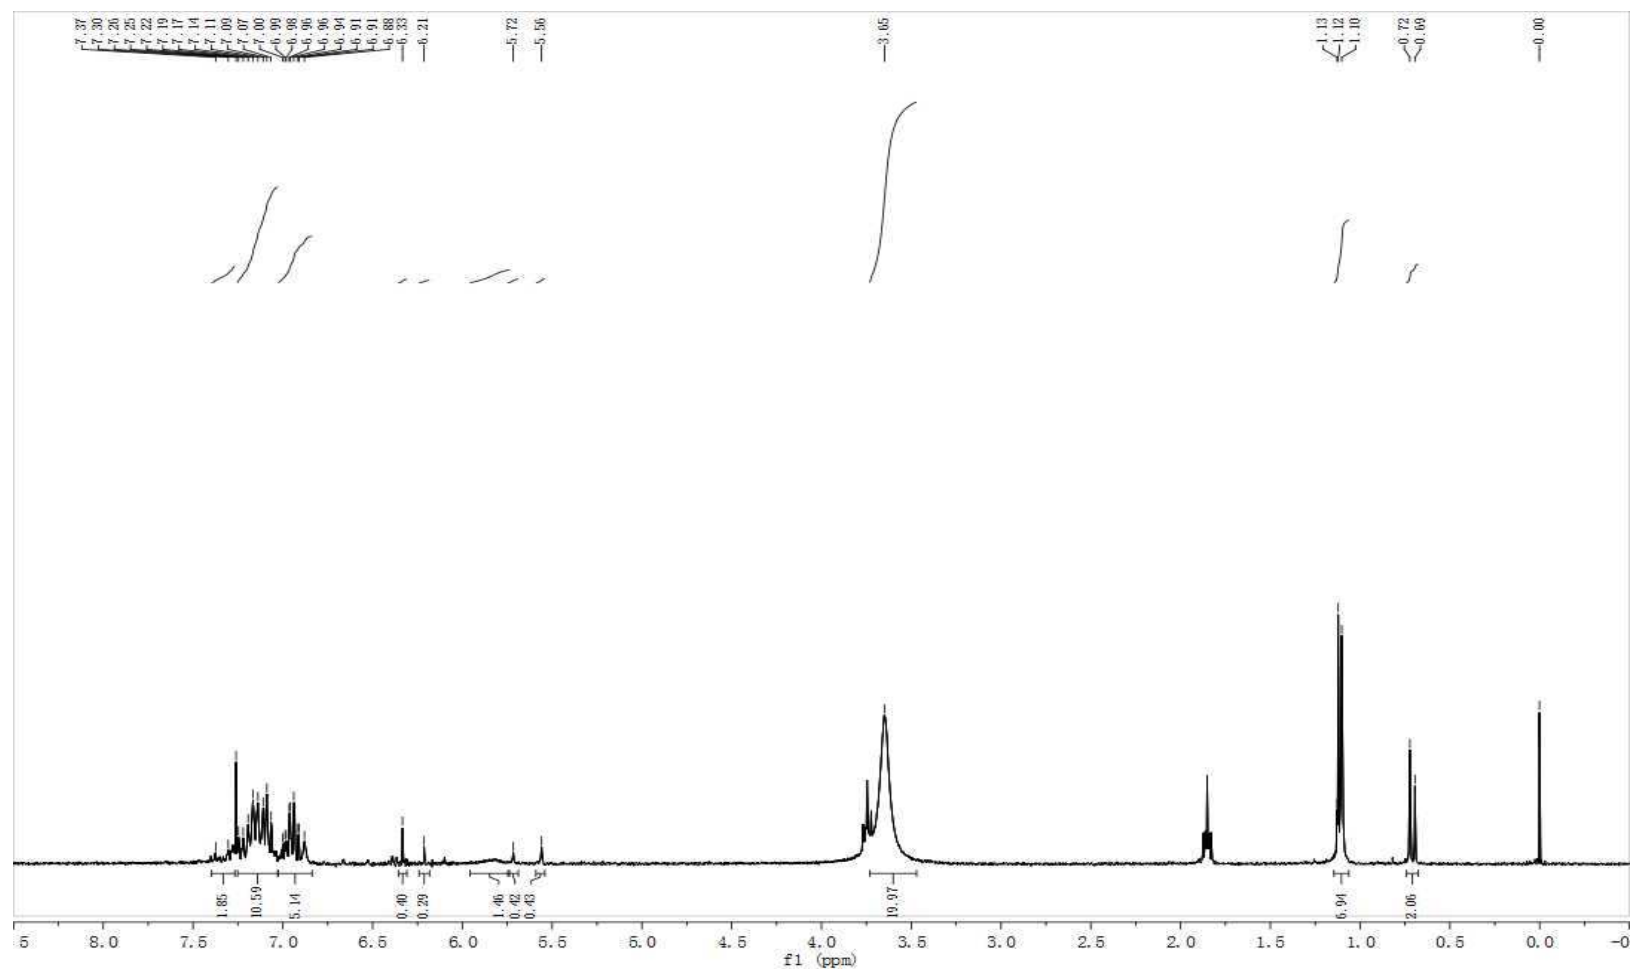

**Fig. S13** <sup>1</sup>H NMR spectrum of **1b** in chloroform-d (400 MHz, 25 °C).

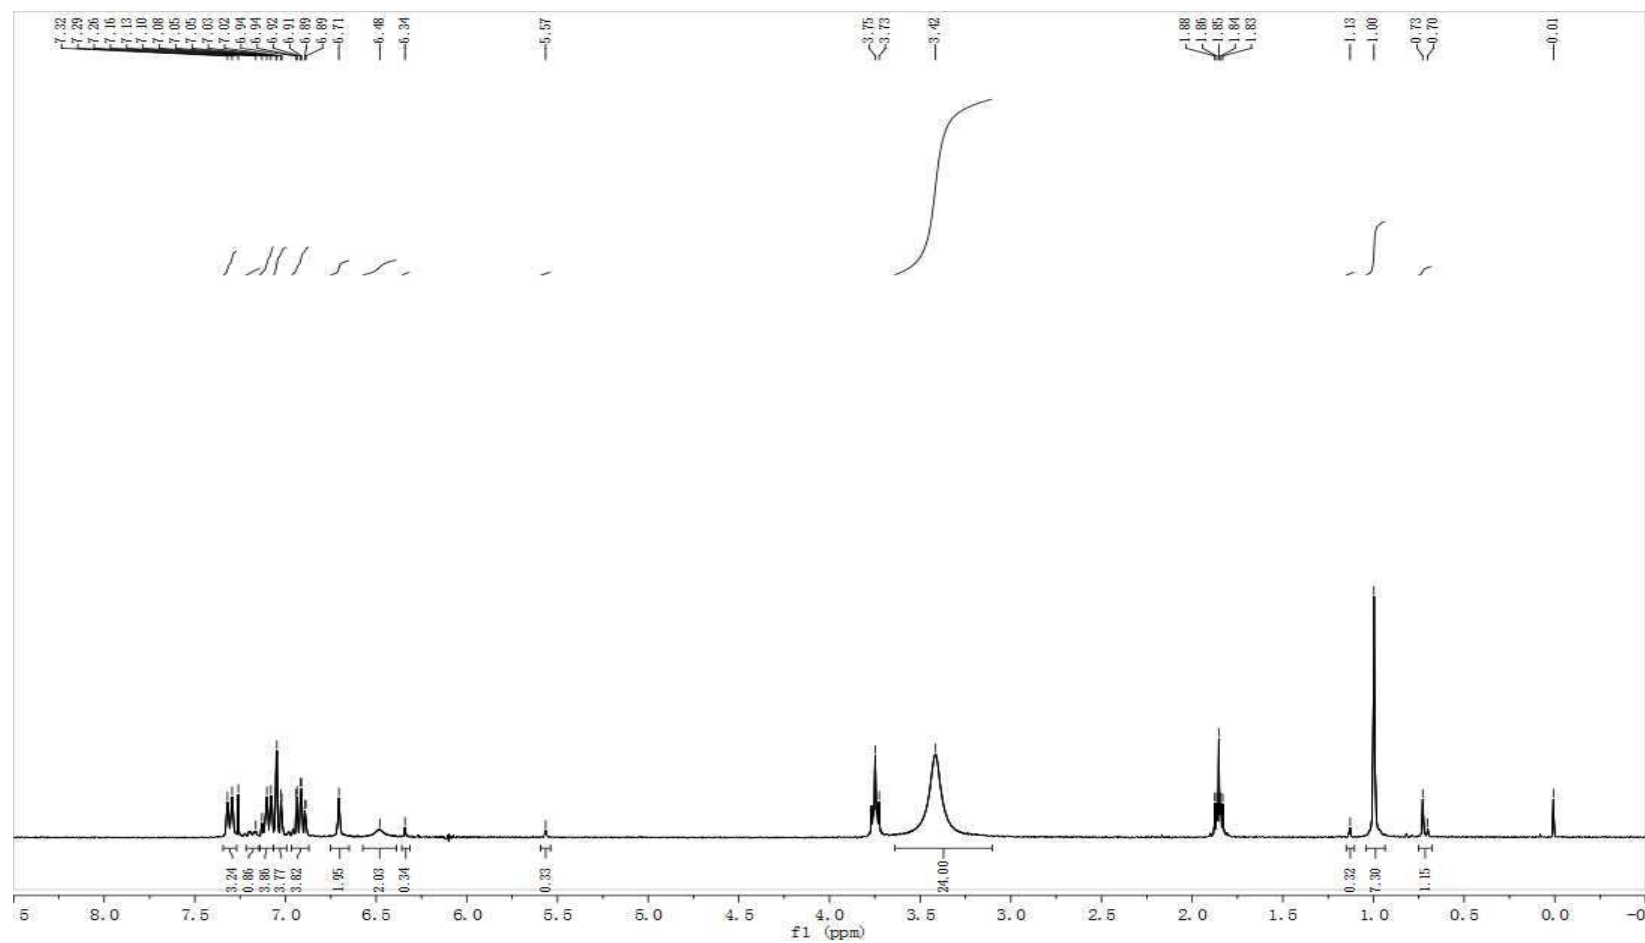

**Fig. S14**  $^1\text{H}$  NMR spectrum of **1c** in chloroform- $d$  (400 MHz, 25  $^{\circ}\text{C}$ ).

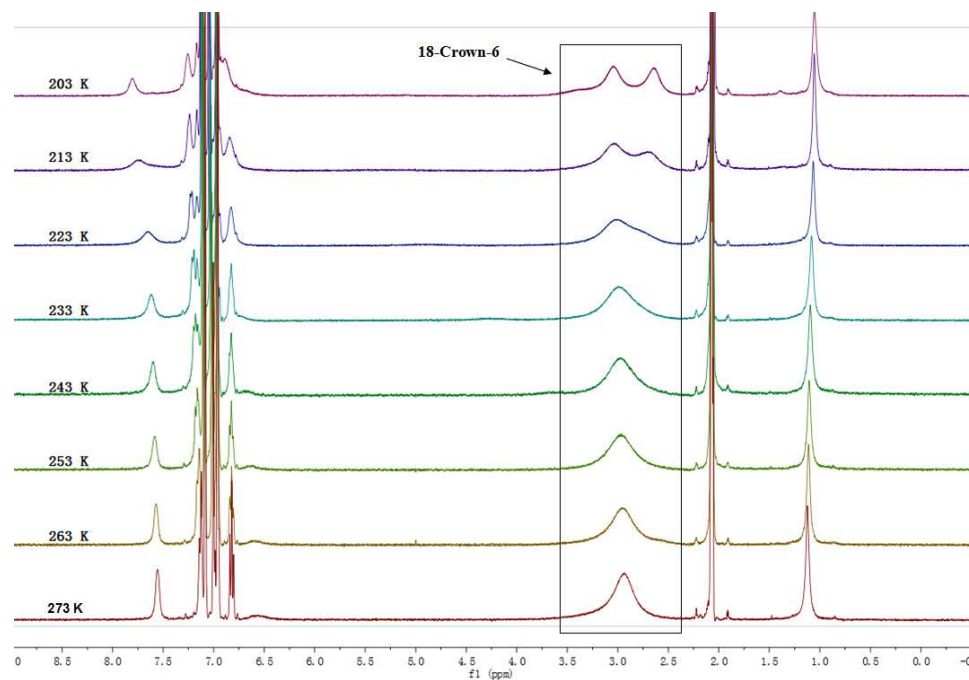

**Figure. S15** Variable temperature dependent  $^1\text{H}$  NMR spectra of **1a**. (toluene- $d_8$ , 273K-203K, 400 MHz). (18-crown-6 is firmly coordinated to  $\text{K}^+$ , because almost no NMR peaks of free 18-crown-6 exists in solution which also can be proved in our previous work (J. Zhang, J. Xiong, Y. Sun, N. Tang and J. Wu, *Macromolecules* 2014, **47**, 7789-7796.). The split NMR peaks may results from the restriction of the rotation of 18-crown-6 around  $\text{K}^+$ .)

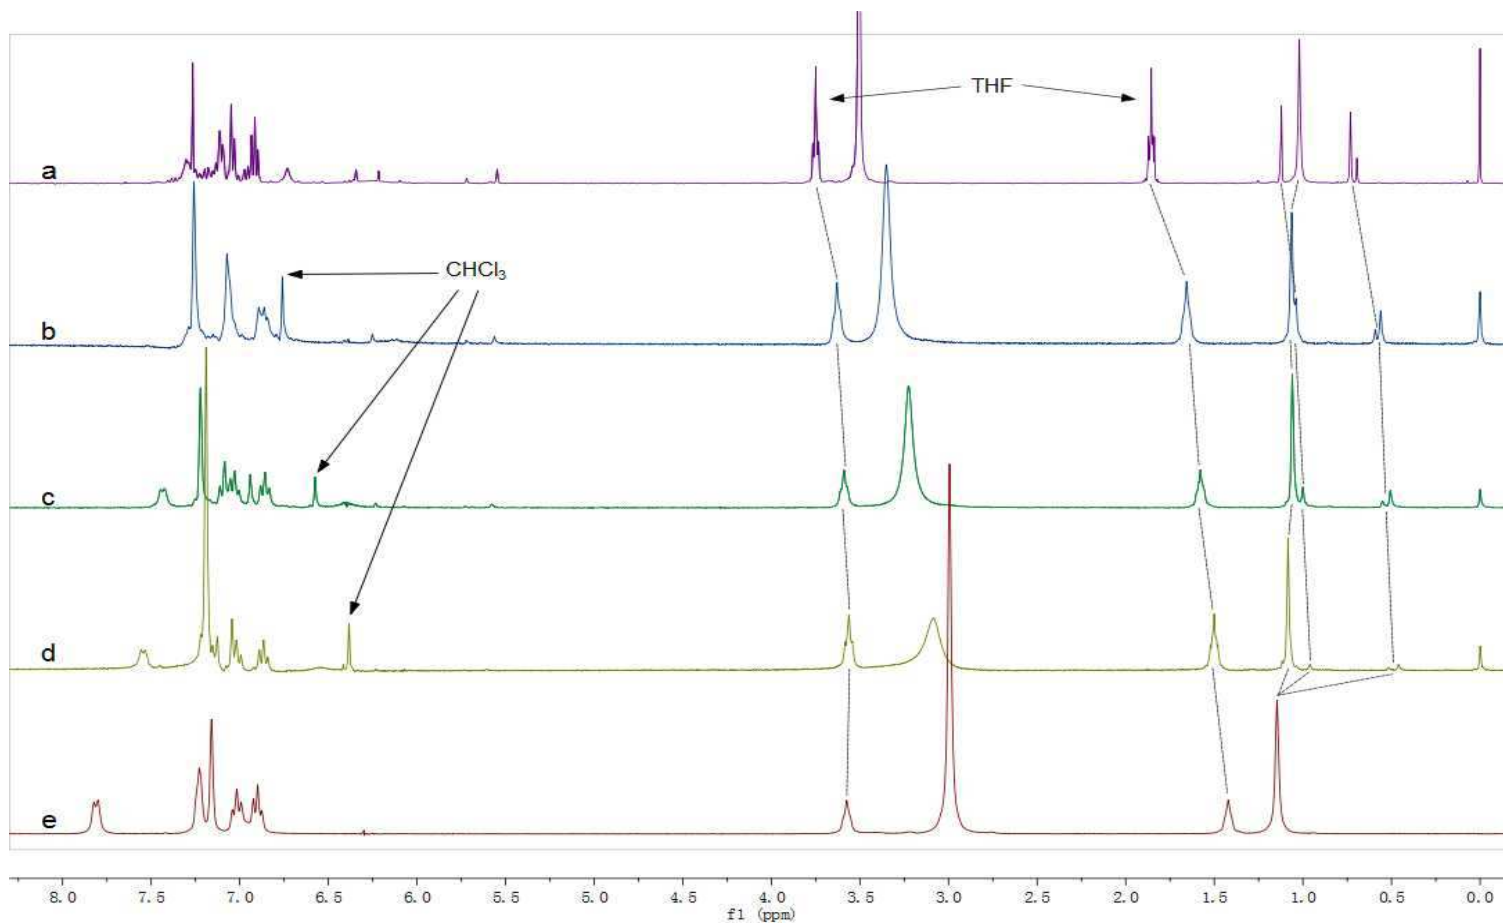

**Fig. S16** <sup>1</sup>H NMR spectra of **1a** in different polarity of solvents: (a) chloroform-d; (b) chloroform-d : benzene-d<sub>6</sub> = 2:1; (c) chloroform-d : benzene-d<sub>6</sub> = 1:1; (d) chloroform-d : benzene-d<sub>6</sub> = 1:2; (e) benzene-d<sub>6</sub>.

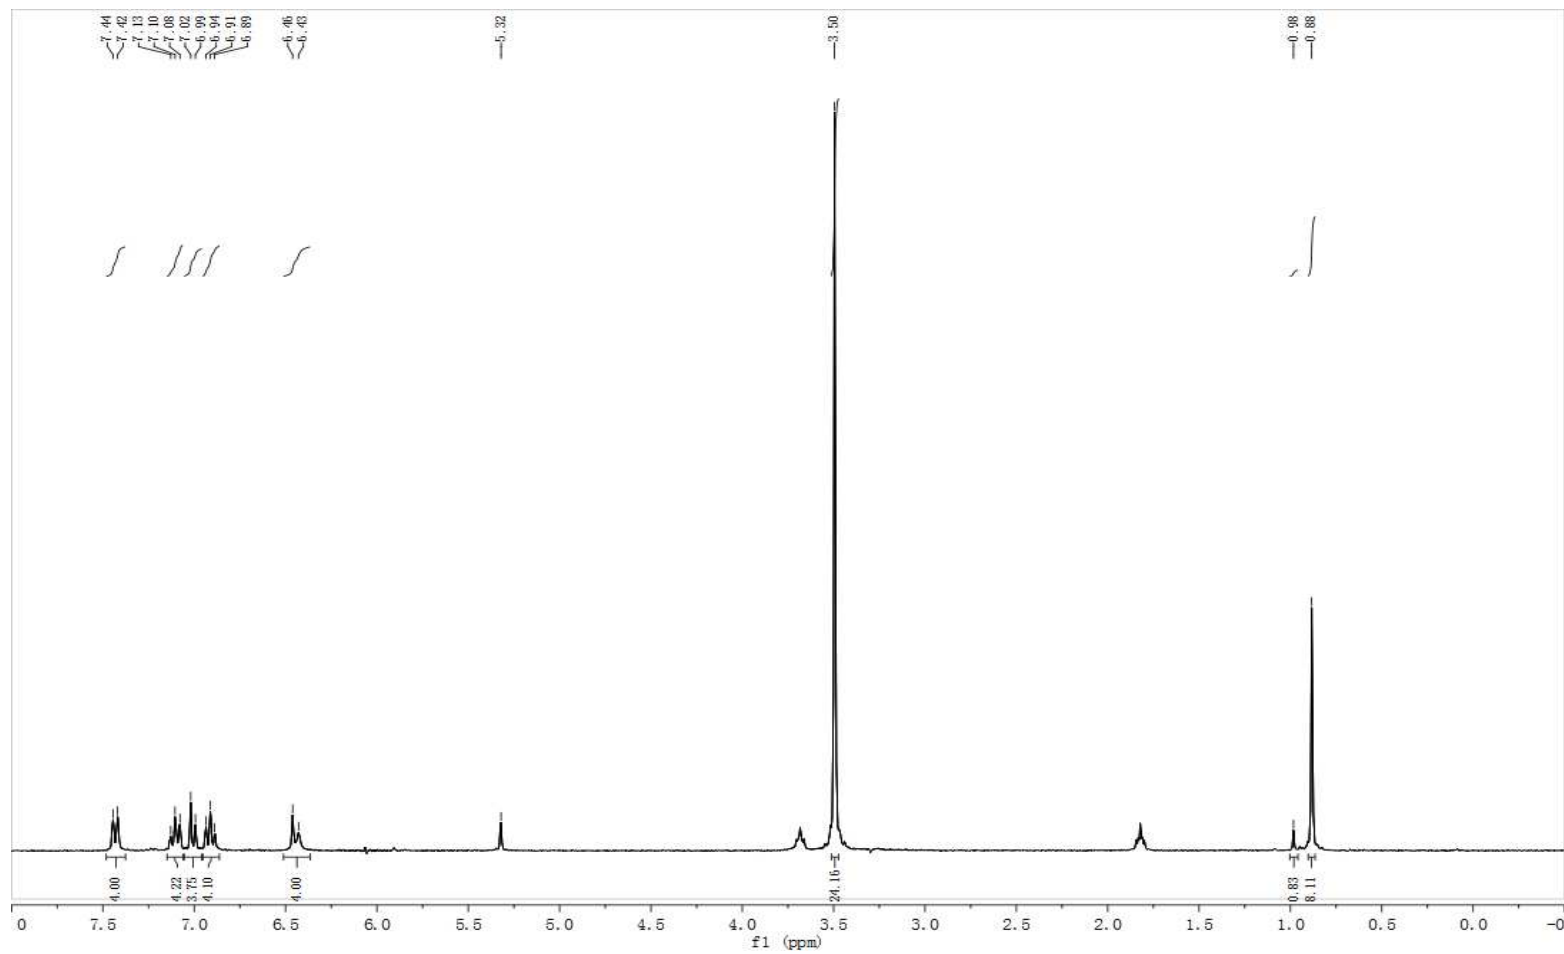

**Fig. S17** <sup>1</sup>H NMR spectrum of **1a** in Dichloromethane-d<sub>2</sub> (300 MHz, 25 °C).

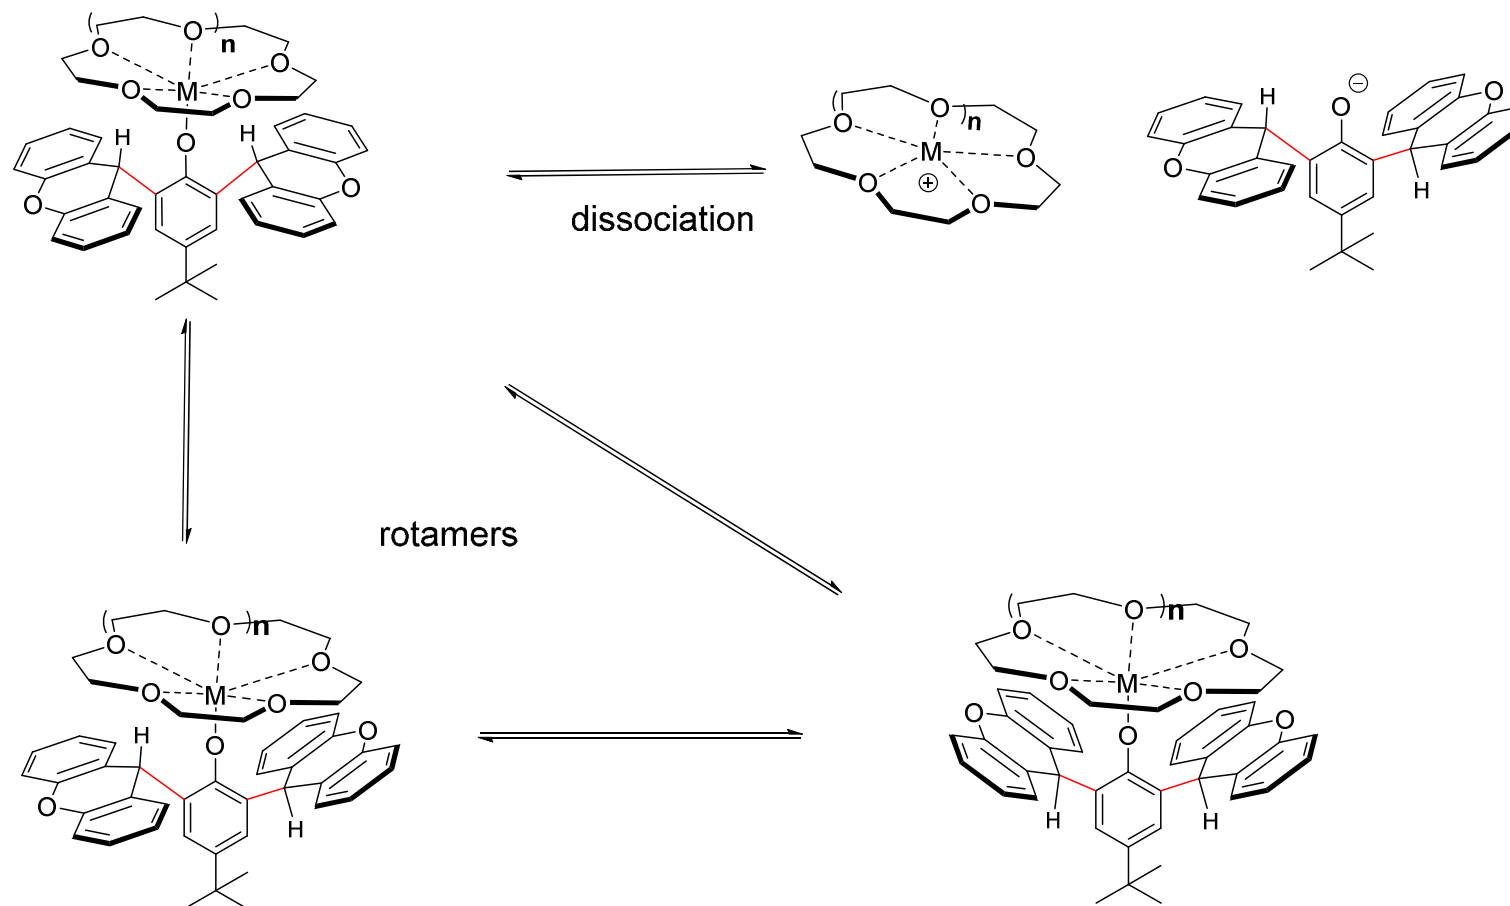

**Fig. S18** Some possible rotational isomers.

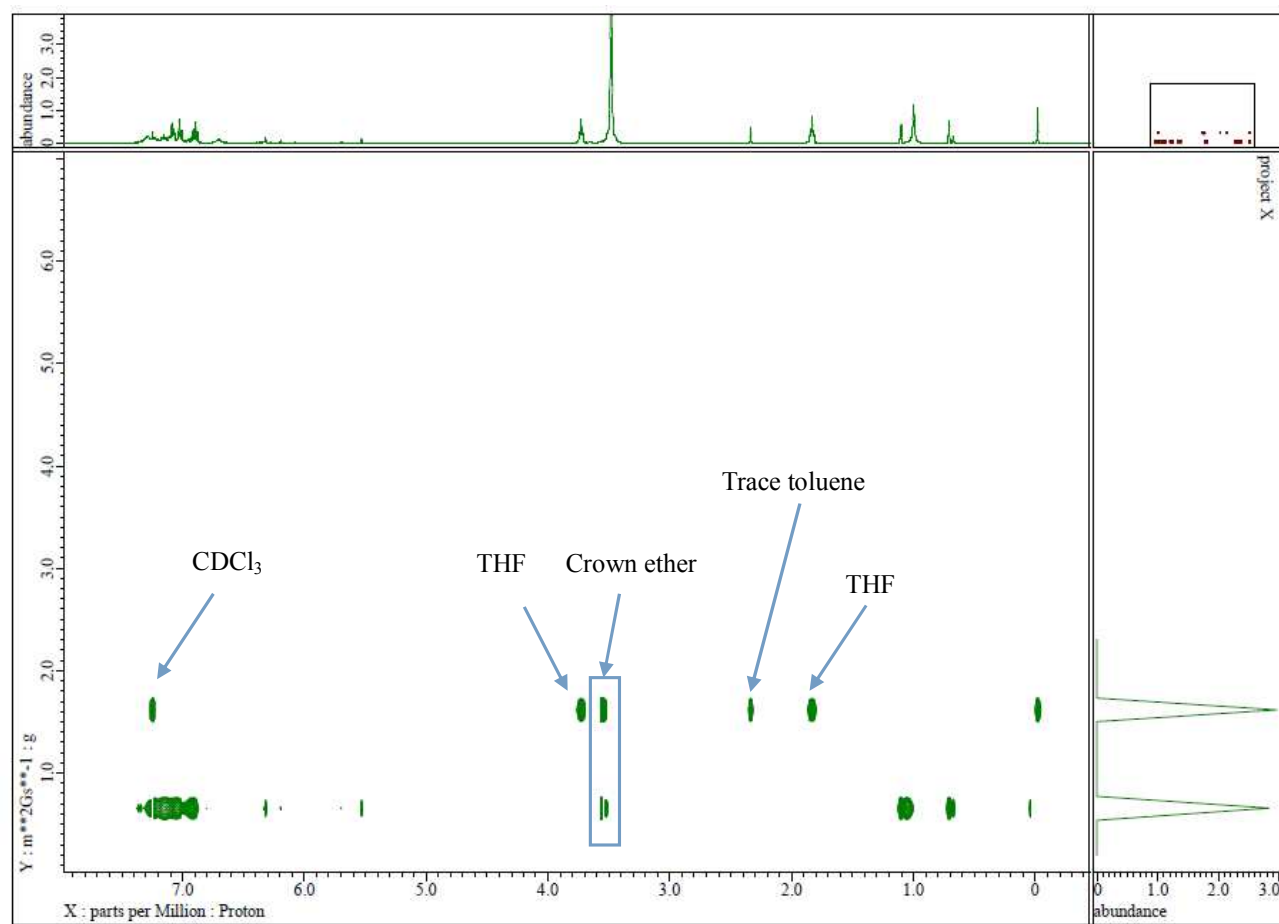

**Fig. 19** DOSY spectra (CDCl<sub>3</sub>, 25 °C) of complex **1a**.

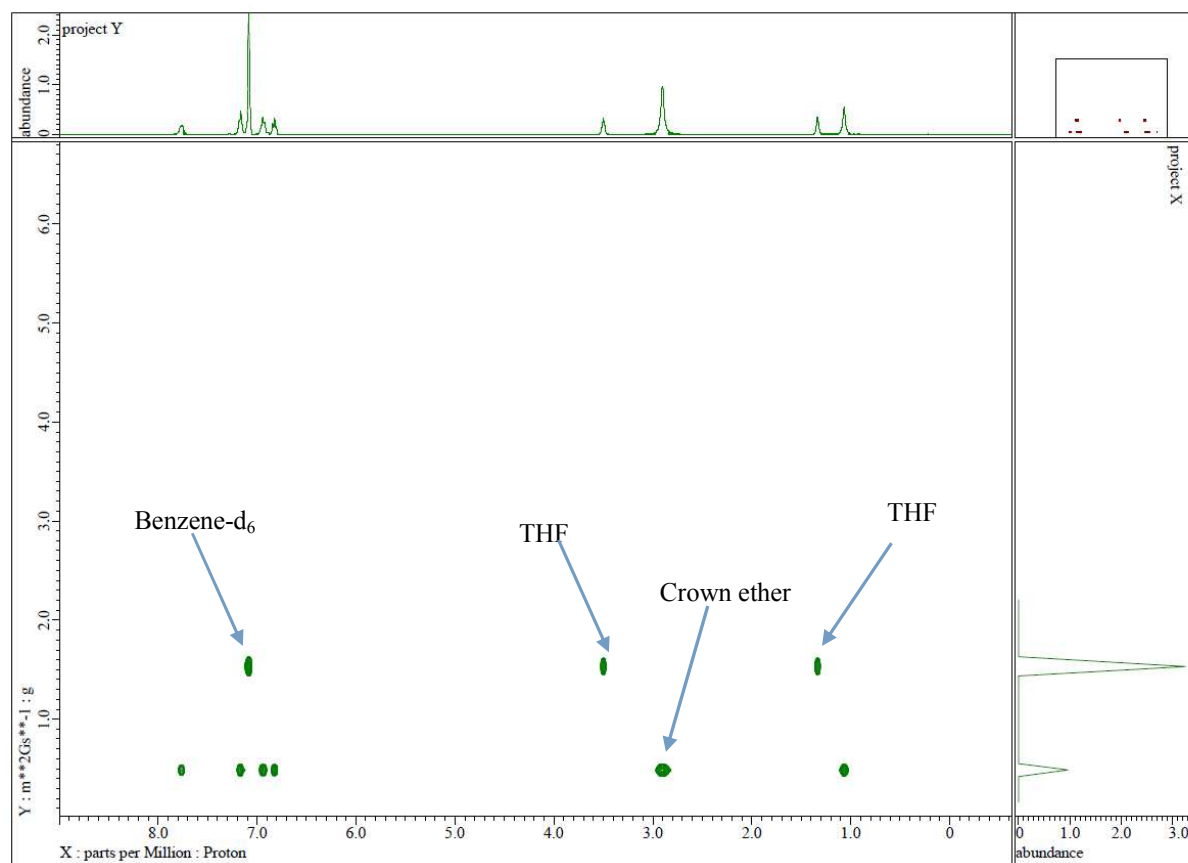

**Fig. S20** DOSY spectra (benzene- $d_6$ , 25 °C) of complex **1a**.



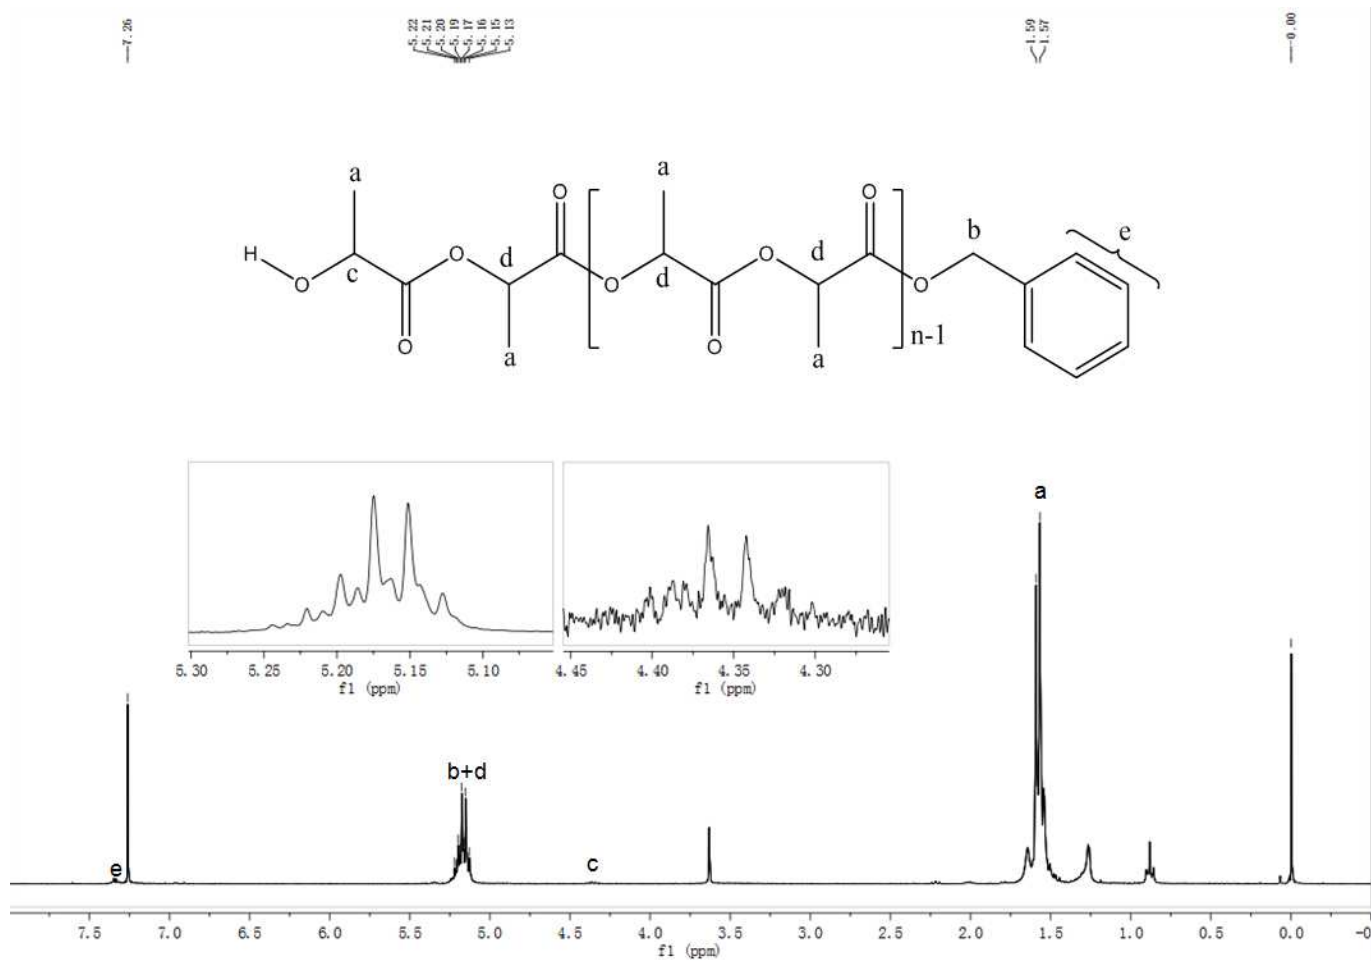

**Fig. S21** <sup>1</sup>H NMR spectrum of PLA prepared by catalyst **1a** ([LA]<sub>0</sub>/[M]<sub>0</sub>/[BnOH]<sub>0</sub> = 25:1:1).

daizhongran-1 141103095844#1 RT: 0.01 AV: 1 NL: 4.29E4  
T: FTMS+cESI Full ms [200.00-4000.00]

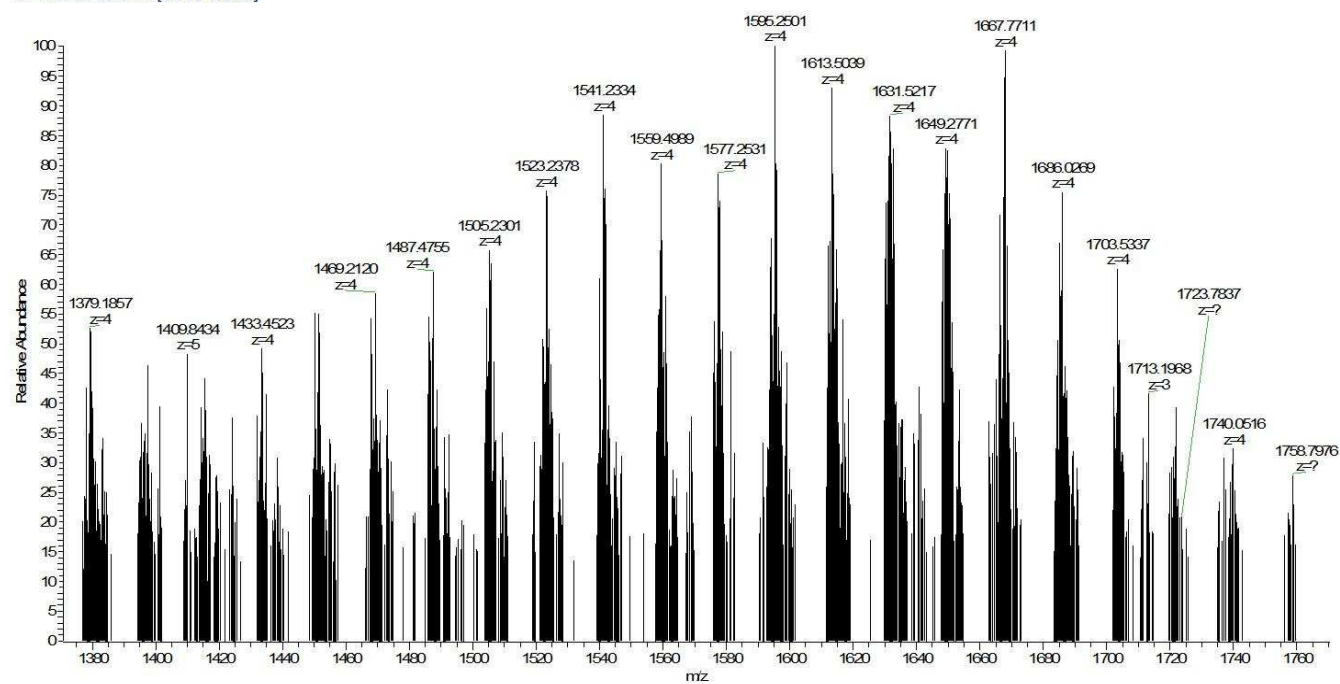

**Fig. S22** ESI-MS spectrum of PLA prepared by catalyst **1a** ( $[LA]_0:[M]_0:[BnOH]_0 = 50 : 1 : 1$ , Mass =  $(72.0211m + 108.0575 (\text{PhCH}_2\text{OH}) + 4.0313 (4\text{H}^+))/4$ ).

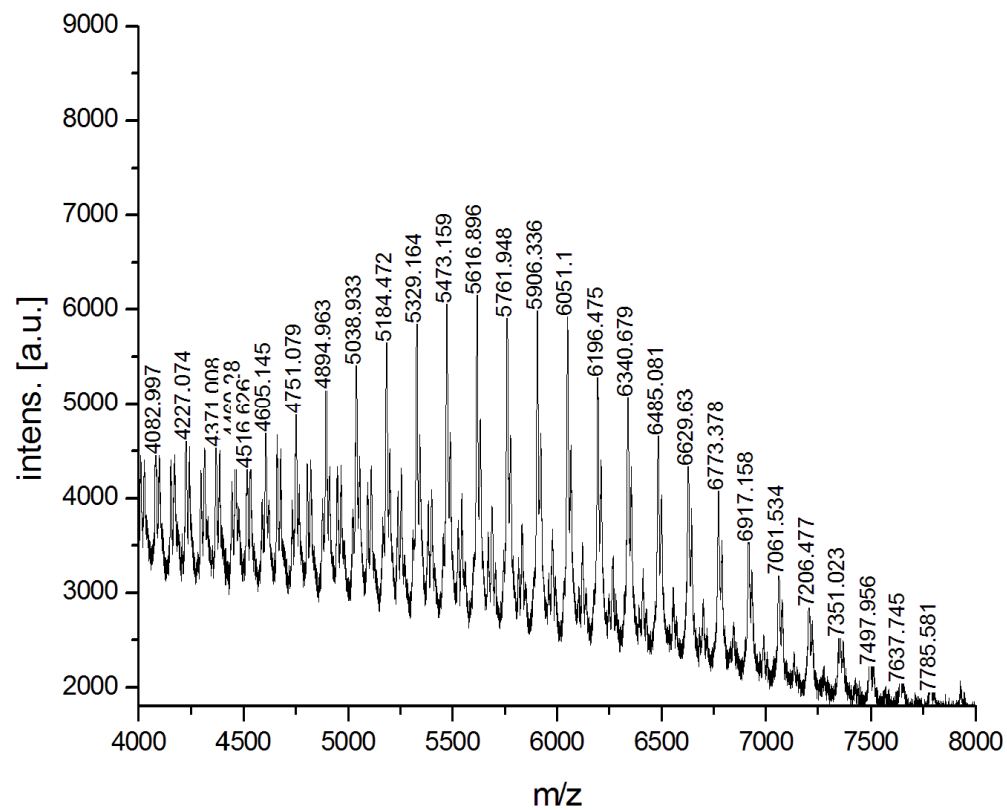

**Fig. S23** MALDI-TOF-MS spectrum of PLA prepared by catalyst **1a** ([LA]<sub>0</sub>: [M]<sub>0</sub>: [BnOH]<sub>0</sub> = 50 : 1 : 1).

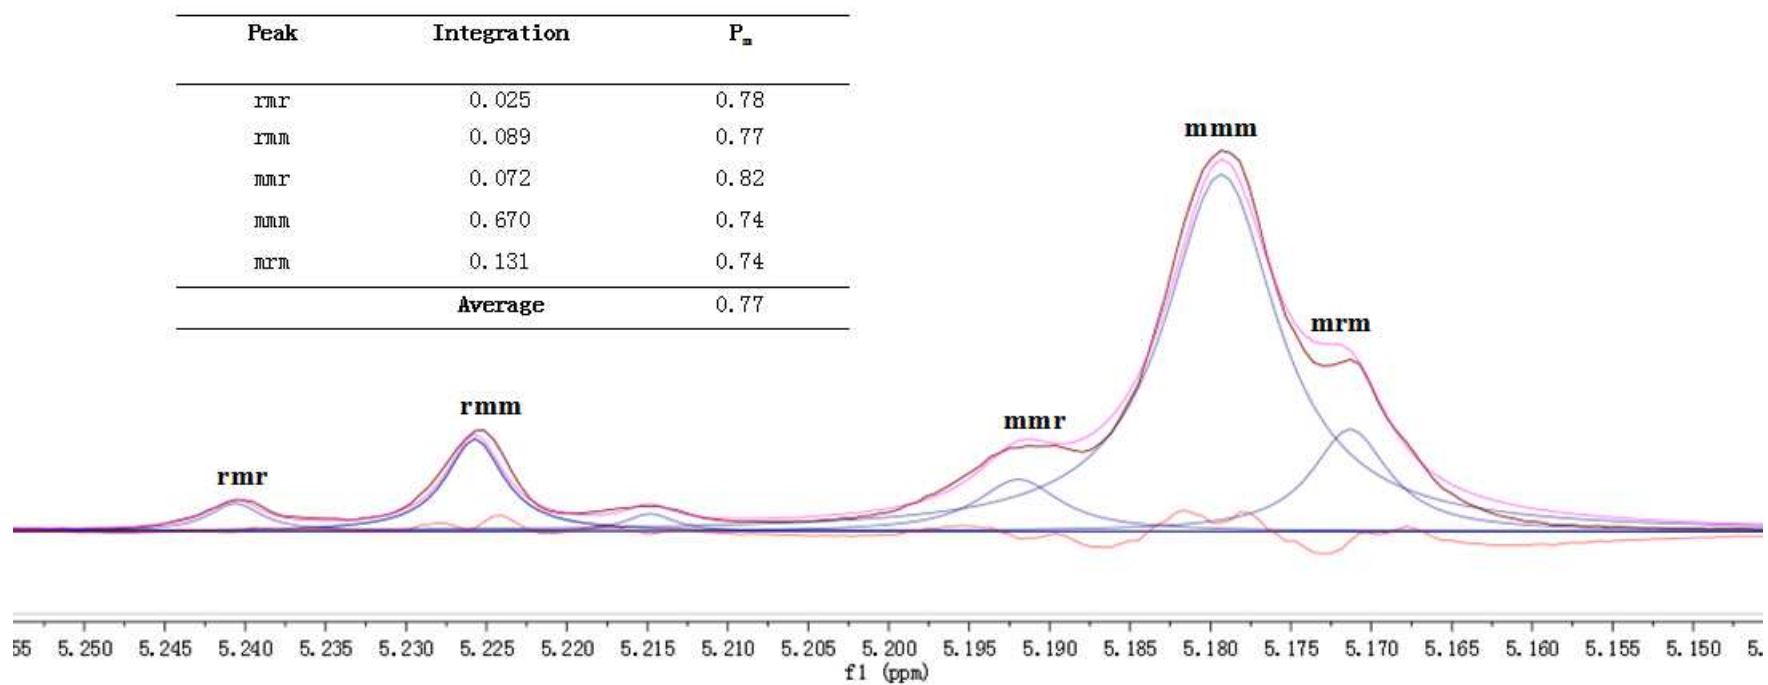

**Fig. S24** The homonuclear-decoupled <sup>1</sup>H NMR spectrum of PLA ([LA]<sub>0</sub>/[M]<sub>0</sub>/[BnOH]<sub>0</sub> = 100:1:1, 25 °C, entry 5, P<sub>n</sub> = 0.77)

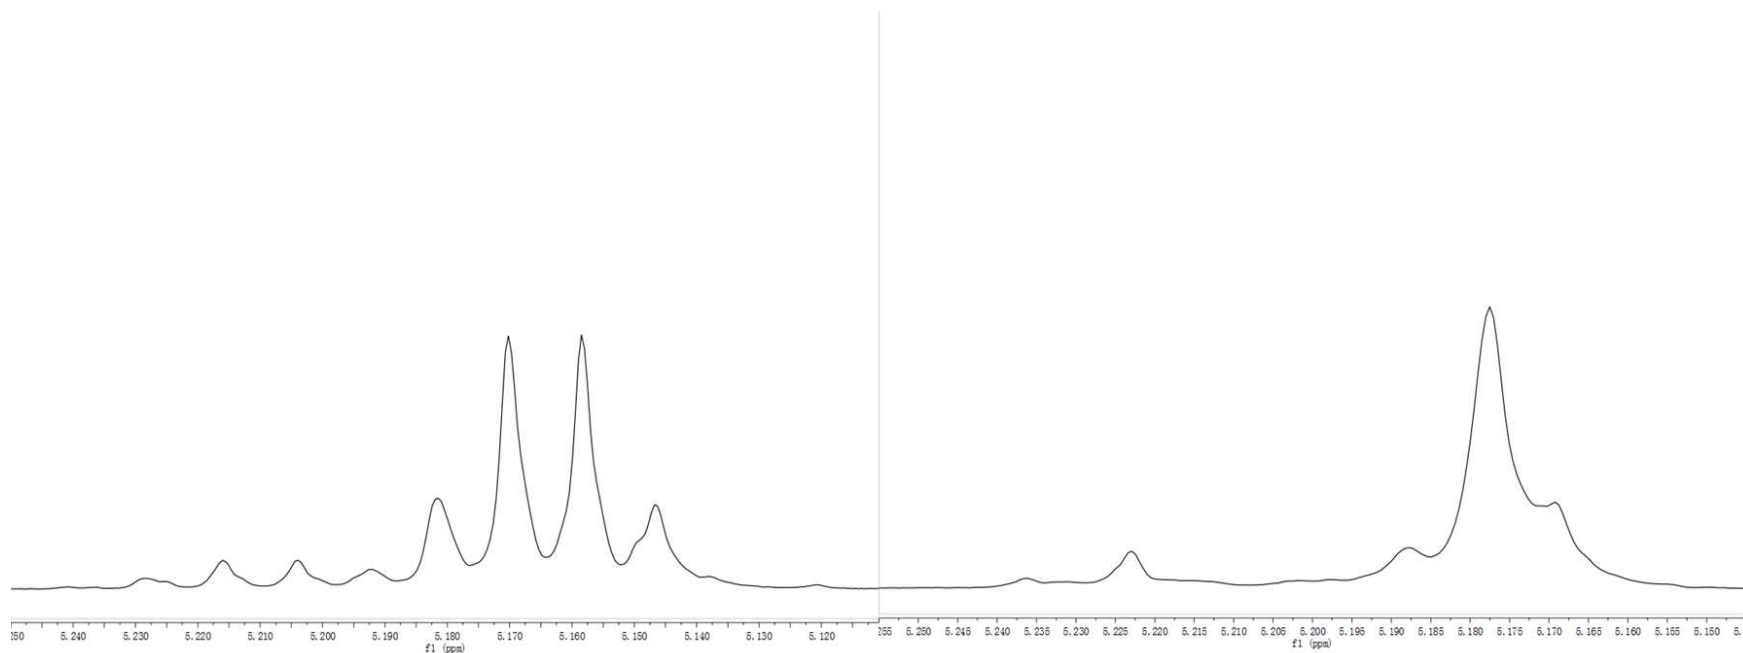

**Fig. S25** The  $^1\text{H}$  NMR spectrum (left) of PLA vs the homonuclear-decoupled  $^1\text{H}$  NMR spectrum (right) of PLA ( $[\text{LA}]_0/[\text{M}]_0/[\text{BnOH}]_0 = 100:1:1$ , 0  $\square$ , entry 12).

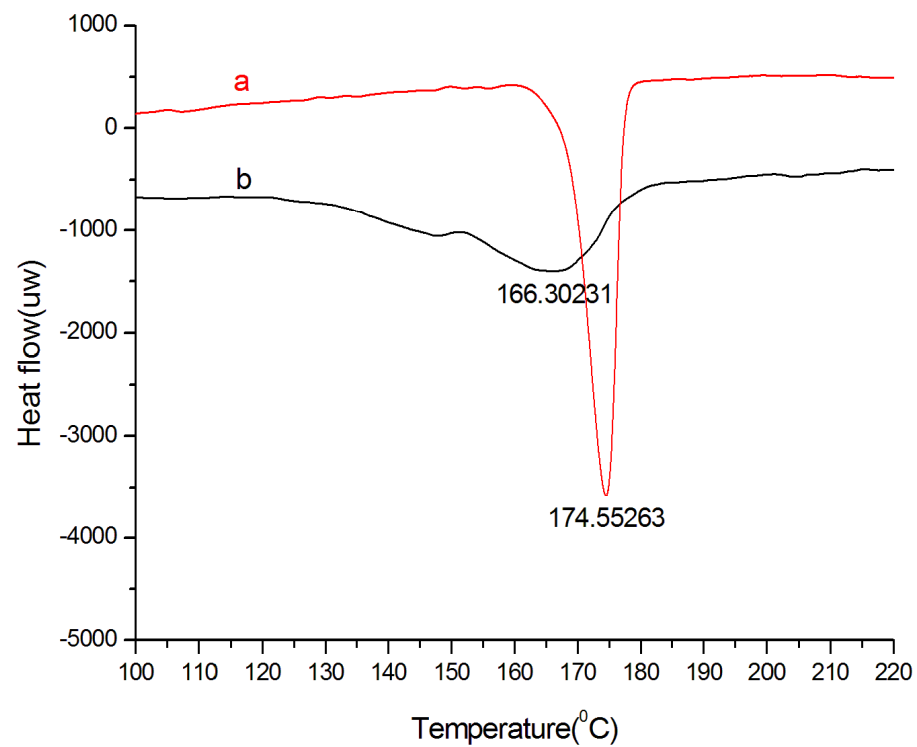

**Fig. S26** DSC thermograms of the second heating cycles of the poly(*rac*-LA) obtained from ROP of *rac*-lactide by using **1a** as a catalyst ( $[LA]_0/[M]_0/[BnOH]_0 = 100:1:1$ , 0 °C,  $P_m = 0.82$ , entry 12, Table 1, the curve shows a melting point ( $T_m$ ) of 166 °C.) (b) and the PLA sample prepared from poly(L-LA) (a).

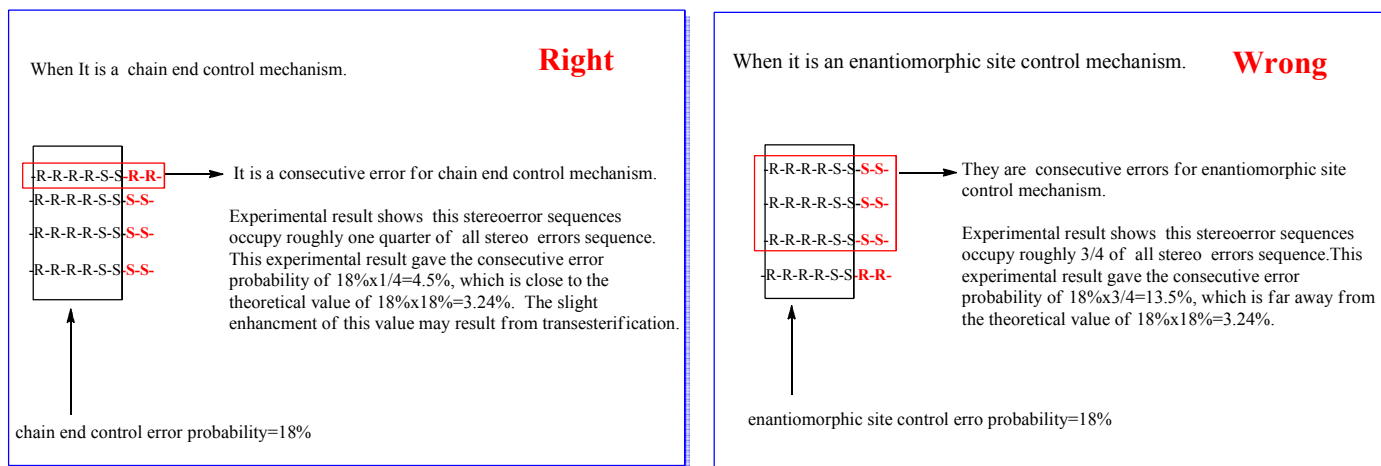

**Fig.S27** the consecutive errors analysis of the homonuclear-decoupled  $^1\text{H}$  NMR spectrum of PLA ( $[\text{LA}]_0/[\text{M}]_0/[\text{BnOH}]_0 = 100:1:1$ , 0 □, entry 12, Table 1)

[1] A. Kowalski, A. Duda, S. Penczek, *Macromolecules* **1998**, *31*, 2114-2122.

[2] G. M. Sheldrick, SHELXL-97 Program; University of Göttingen: Göttingen, Germany, **1996**.
